# Supplementary material
Source: publisher site journal article supplement (https://www.spandidos-publications.com/538/downloadSupplementary)
Supplement: Supplementary file 1 [file downloadSupplementary]

## Sheet: Table S2
Supplementary Table S2.Predicted targets of miR-186-5p by TargetScan version 7.2
Target gene	Representative transcript	Gene name	3P-seq tags + 5	Conserved sites total	Conserved 8mer sites	Conserved 7mer-m8 sites	Conserved 7mer-A1 sites	Poorly conserved sites total	Poorly conserved 8mer sites	Poorly conserved 7mer-m8 sites	Poorly conserved 7mer-A1 sites	6mer sites	Representative miRNA	Cumulative weighted context++ score	Total context++ score	Aggregate PCT	Previous TargetScan publication(s)
FZD3	ENST00000240093.3	frizzled family receptor 3	192	1	0	1	0	6	1	2	3	12	hsa-miR-186-5p	-1.05	-1.27	N/A	2011
AC114546.1	ENST00000391457.2	HCG37415; PRO1914; Uncharacterized protein	5	1	1	0	0	0	0	0	0	0	hsa-miR-186-5p	-0.57	-0.57	N/A
CXCL13	ENST00000286758.4	chemokine (C-X-C motif) ligand 13	5	1	1	0	0	3	0	2	1	5	hsa-miR-186-5p	-0.54	-0.84	N/A	2007, 2009, 2011
GRIN2B	ENST00000609686.1	glutamate receptor, ionotropic, N-methyl D-aspartate 2B	5	3	0	3	0	9	2	4	3	17	hsa-miR-186-5p	-0.54	-0.54	N/A
EIF2D	ENST00000367114.3	eukaryotic translation initiation factor 2D	184	1	1	0	0	0	0	0	0	0	hsa-miR-186-5p	-0.53	-0.53	N/A	2007, 2009, 2011
MAP3K2	ENST00000409947.1	mitogen-activated protein kinase kinase kinase 2	187	1	1	0	0	7	0	3	4	10	hsa-miR-186-5p	-0.51	-0.55	N/A	2007, 2009, 2011
MAPKAPK5	ENST00000550735.2	mitogen-activated protein kinase-activated protein kinase 5	573	1	1	0	0	4	1	2	1	3	hsa-miR-186-5p	-0.43	-0.51	N/A	2009, 2011
SYCP1	ENST00000369522.3	synaptonemal complex protein 1	5	1	1	0	0	2	1	0	1	0	hsa-miR-186-5p	-0.42	-0.42	N/A	2007, 2009, 2011
KB-1980E6.3	ENST00000523572.1	Uncharacterized protein	5	1	1	0	0	0	0	0	0	0	hsa-miR-186-5p	-0.41	-0.41	N/A
SMIM15	ENST00000339020.3	small integral membrane protein 15	1037	2	1	1	0	1	0	1	0	3	hsa-miR-186-5p	-0.41	-0.47	N/A	2007, 2009, 2011
DNAJC8	ENST00000263697.4	DnaJ (Hsp40) homolog, subfamily C, member 8	584	1	0	1	0	2	1	1	0	0	hsa-miR-186-5p	-0.39	-0.4	N/A	2009, 2011
ARAP2	ENST00000303965.4	ArfGAP with RhoGAP domain, ankyrin repeat and PH domain 2	121	1	1	0	0	1	0	0	1	2	hsa-miR-186-5p	-0.39	-0.4	N/A	2009, 2011
AC079341.1	ENST00000424958.1	Uncharacterized protein	5	1	1	0	0	0	0	0	0	0	hsa-miR-186-5p	-0.37	-0.37	N/A
RPS6KB1	ENST00000225577.4	ribosomal protein S6 kinase, 70kDa, polypeptide 1	16	1	1	0	0	3	1	0	2	3	hsa-miR-186-5p	-0.36	-0.36	N/A	2007, 2009, 2011
HOXB2	ENST00000330070.4	homeobox B2	1282	1	1	0	0	1	0	0	1	0	hsa-miR-186-5p	-0.35	-0.36	N/A	2009, 2011
DUS3L	ENST00000320699.8	dihydrouridine synthase 3-like (S. cerevisiae)	31	1	0	1	0	0	0	0	0	0	hsa-miR-186-5p	-0.34	-0.34	N/A
POC1B-GALNT4	ENST00000547474.1	POC1B-GALNT4 readthrough	275	1	0	1	0	2	2	0	0	1	hsa-miR-186-5p	-0.33	-0.33	N/A
FUT8	ENST00000360689.5	fucosyltransferase 8 (alpha (1,6) fucosyltransferase)	64	1	1	0	0	1	0	1	0	0	hsa-miR-186-5p	-0.31	-0.36	N/A	2009, 2011
NIT2	ENST00000394140.4	nitrilase family, member 2	133	1	1	0	0	1	0	1	0	8	hsa-miR-186-5p	-0.31	-0.34	N/A
PID1	ENST00000392054.3	phosphotyrosine interaction domain containing 1	896	1	1	0	0	2	1	0	1	0	hsa-miR-186-5p	-0.29	-0.33	N/A	2007, 2009, 2011
HNMT	ENST00000280097.3	histamine N-methyltransferase	530	1	1	0	0	1	1	0	0	0	hsa-miR-186-5p	-0.28	-0.3	N/A	2007, 2009, 2011
FOXN2	ENST00000340553.3	forkhead box N2	441	1	1	0	0	3	1	2	0	5	hsa-miR-186-5p	-0.28	-0.28	N/A	2009, 2011
IRF8	ENST00000268638.5	interferon regulatory factor 8	9	1	1	0	0	2	0	2	0	1	hsa-miR-186-5p	-0.26	-0.26	N/A	2011
GABRA4	ENST00000264318.3	gamma-aminobutyric acid (GABA) A receptor, alpha 4	5	3	2	1	0	8	1	2	5	8	hsa-miR-186-5p	-0.26	-0.26	N/A	2007, 2009, 2011
INSM1	ENST00000310227.1	insulinoma-associated 1	20	1	1	0	0	1	0	0	1	0	hsa-miR-186-5p	-0.26	-0.26	N/A	2007, 2009, 2011
BMPR1A	ENST00000372037.3	bone morphogenetic protein receptor, type IA	125	2	2	0	0	5	0	1	4	7	hsa-miR-186-5p	-0.26	-0.35	N/A
UHMK1	ENST00000538489.1	U2AF homology motif (UHM) kinase 1	48	1	0	1	0	7	1	4	2	3	hsa-miR-186-5p	-0.26	-0.44	N/A	2011
DSPP	ENST00000282478.7	dentin sialophosphoprotein	5	1	1	0	0	0	0	0	0	0	hsa-miR-186-5p	-0.25	-0.25	N/A	2009, 2011
DUT	ENST00000559540.1	deoxyuridine triphosphatase	1860	2	0	2	0	3	0	1	2	5	hsa-miR-186-5p	-0.25	-0.31	N/A
PRKAA2	ENST00000371244.4	protein kinase, AMP-activated, alpha 2 catalytic subunit	561	1	1	0	0	3	0	2	1	6	hsa-miR-186-5p	-0.25	-0.26	N/A	2009, 2011
GMFB	ENST00000554908.1	glia maturation factor, beta	15	1	1	0	0	2	1	0	1	5	hsa-miR-186-5p	-0.25	-0.47	N/A
UBE2K	ENST00000261427.5	ubiquitin-conjugating enzyme E2K	762	1	0	0	1	6	1	3	2	3	hsa-miR-186-5p	-0.24	-0.86	N/A	2011
RHBDF2	ENST00000389760.4	rhomboid 5 homolog 2 (Drosophila)	228	1	1	0	0	0	0	0	0	0	hsa-miR-186-5p	-0.24	-0.24	N/A	2011
ACSM2A	ENST00000573854.1	acyl-CoA synthetase medium-chain family member 2A	34	1	1	0	0	1	1	0	0	2	hsa-miR-186-5p	-0.24	-0.27	N/A	2011
ACSM2B	ENST00000329697.6	acyl-CoA synthetase medium-chain family member 2B	37	1	1	0	0	2	1	1	0	3	hsa-miR-186-5p	-0.24	-0.29	N/A
CLPX	ENST00000300107.3	caseinolytic mitochondrial matrix peptidase chaperone subunit	251	2	2	0	0	2	0	2	0	3	hsa-miR-186-5p	-0.24	-0.25	N/A
UBE2R2	ENST00000263228.3	ubiquitin-conjugating enzyme E2R 2	2442	2	1	1	0	2	0	1	1	2	hsa-miR-186-5p	-0.24	-0.27	N/A	2009, 2011
LIN7C	ENST00000278193.2	lin-7 homolog C (C. elegans)	1701	1	0	0	1	2	0	1	1	6	hsa-miR-186-5p	-0.23	-0.25	N/A
TOB1	ENST00000499247.2	transducer of ERBB2, 1	102	1	1	0	0	0	0	0	0	0	hsa-miR-186-5p	-0.23	-0.4	N/A	2007, 2009, 2011
BDH2	ENST00000296424.4	3-hydroxybutyrate dehydrogenase, type 2	57	1	1	0	0	0	0	0	0	2	hsa-miR-186-5p	-0.23	-0.28	N/A
SUMO2	ENST00000420826.2	small ubiquitin-like modifier 2	75	2	0	1	1	1	0	0	1	1	hsa-miR-186-5p	-0.22	-0.22	N/A
MXD1	ENST00000264444.2	MAX dimerization protein 1	183	1	1	0	0	3	0	1	2	4	hsa-miR-186-5p	-0.22	-0.33	N/A	2011
MOB1A	ENST00000396049.4	MOB kinase activator 1A	963	1	0	0	1	3	0	2	1	0	hsa-miR-186-5p	-0.22	-0.24	N/A
BCAT1	ENST00000261192.7	branched chain amino-acid transaminase 1, cytosolic	1346	2	1	1	0	6	1	3	2	8	hsa-miR-186-5p	-0.22	-0.23	N/A	2009, 2011
GPR37	ENST00000303921.2	G protein-coupled receptor 37 (endothelin receptor type B-like)	395	1	1	0	0	2	0	0	2	5	hsa-miR-186-5p	-0.22	-0.24	N/A	2011
ZDHHC13	ENST00000446113.2	zinc finger, DHHC-type containing 13	76	1	1	0	0	0	0	0	0	0	hsa-miR-186-5p	-0.22	-0.22	N/A
UBE2B	ENST00000265339.2	ubiquitin-conjugating enzyme E2B	3421	1	1	0	0	1	1	0	0	2	hsa-miR-186-5p	-0.21	-0.34	N/A	2007, 2009, 2011
SCN2A	ENST00000375437.2	sodium channel, voltage-gated, type II, alpha subunit	7	1	1	0	0	0	0	0	0	1	hsa-miR-186-5p	-0.21	-0.21	N/A	2011
FAM160B1	ENST00000369248.4	family with sequence similarity 160, member B1	91	2	1	1	0	1	0	0	1	3	hsa-miR-186-5p	-0.21	-0.28	N/A
STK17B	ENST00000263955.4	serine/threonine kinase 17b	113	4	3	1	0	2	2	0	0	0	hsa-miR-186-5p	-0.21	-0.25	N/A	2011
THEMIS	ENST00000368250.1	thymocyte selection associated	5	1	1	0	0	3	1	1	1	2	hsa-miR-186-5p	-0.21	-0.21	N/A
SUCLA2	ENST00000378654.3	succinate-CoA ligase, ADP-forming, beta subunit	62	1	1	0	0	0	0	0	0	3	hsa-miR-186-5p	-0.2	-0.2	N/A	2007
PSPH	ENST00000275605.3	phosphoserine phosphatase	3231	1	1	0	0	0	0	0	0	1	hsa-miR-186-5p	-0.2	-0.21	N/A	2007, 2011
ANK3	ENST00000280772.2	ankyrin 3, node of Ranvier (ankyrin G)	74	1	1	0	0	0	0	0	0	2	hsa-miR-186-5p	-0.2	-0.21	N/A	2011
CLLU1	ENST00000378485.1	chronic lymphocytic leukemia up-regulated 1	5	1	0	1	0	2	0	1	1	1	hsa-miR-186-5p	-0.2	-0.2	N/A	2009
PTH	ENST00000282091.1	parathyroid hormone	5	1	0	1	0	0	0	0	0	0	hsa-miR-186-5p	-0.2	-0.2	N/A	2009, 2011
TPR	ENST00000367478.4	translocated promoter region, nuclear basket protein	529	1	1	0	0	0	0	0	0	1	hsa-miR-186-5p	-0.19	-0.2	N/A	2007, 2009, 2011
DSTN	ENST00000246069.7	destrin (actin depolymerizing factor)	10116	1	1	0	0	1	0	0	1	1	hsa-miR-186-5p	-0.19	-0.23	N/A
CA1	ENST00000523953.1	carbonic anhydrase I	5	1	1	0	0	0	0	0	0	1	hsa-miR-186-5p	-0.19	-0.19	N/A
ZC3H11A	ENST00000332127.4	zinc finger CCCH-type containing 11A	71	1	0	1	0	4	2	1	1	2	hsa-miR-186-5p	-0.19	-0.19	N/A	2007
TMEM251	ENST00000415050.2	transmembrane protein 251	14	1	1	0	0	0	0	0	0	5	hsa-miR-186-5p	-0.19	-0.19	N/A
ZNF644	ENST00000370440.1	zinc finger protein 644	40	1	1	0	0	5	0	4	1	1	hsa-miR-186-5p	-0.19	-0.34	N/A	2007, 2009, 2011
CHST2	ENST00000309575.3	carbohydrate (N-acetylglucosamine-6-O) sulfotransferase 2	154	1	0	1	0	1	0	0	1	2	hsa-miR-186-5p	-0.19	-0.26	N/A	2011
SAMD12	ENST00000409003.4	sterile alpha motif domain containing 12	57	1	1	0	0	8	0	6	2	9	hsa-miR-186-5p	-0.19	-0.19	N/A	2011
TRAPPC8	ENST00000283351.4	trafficking protein particle complex 8	502	2	1	1	0	1	0	0	1	0	hsa-miR-186-5p	-0.19	-0.19	N/A	2007, 2009, 2011
BCAR3	ENST00000370247.3	breast cancer anti-estrogen resistance 3	321	1	1	0	0	0	0	0	0	0	hsa-miR-186-5p	-0.18	-0.22	N/A	2007, 2011
FAM193B	ENST00000514747.1	family with sequence similarity 193, member B	77	1	1	0	0	0	0	0	0	0	hsa-miR-186-5p	-0.18	-0.18	N/A	2009, 2011
PIGF	ENST00000281382.6	phosphatidylinositol glycan anchor biosynthesis, class F	5	1	0	1	0	0	0	0	0	3	hsa-miR-186-5p	-0.18	-0.18	N/A
MIB1	ENST00000261537.6	mindbomb E3 ubiquitin protein ligase 1	897	1	1	0	0	10	2	4	4	1	hsa-miR-186-5p	-0.18	-0.21	N/A	2011
CALB1	ENST00000265431.3	calbindin 1, 28kDa	5	1	0	1	0	1	1	0	0	3	hsa-miR-186-5p	-0.18	-0.18	N/A	2007, 2009, 2011
TMED2	ENST00000262225.3	transmembrane emp24 domain trafficking protein 2	3025	1	0	1	0	1	0	1	0	5	hsa-miR-186-5p	-0.18	-0.18	N/A	2007
NOG	ENST00000332822.4	noggin	107	1	1	0	0	0	0	0	0	0	hsa-miR-186-5p	-0.18	-0.3	N/A	2009, 2011
YY1	ENST00000262238.4	YY1 transcription factor	1803	3	1	1	1	1	1	0	0	5	hsa-miR-186-5p	-0.18	-0.19	N/A	2007, 2009, 2011
RAB2A	ENST00000262646.7	RAB2A, member RAS oncogene family	788	1	1	0	0	3	0	3	0	8	hsa-miR-186-5p	-0.18	-0.27	N/A	2011
RAB11B	ENST00000328024.6	RAB11B, member RAS oncogene family	920	1	1	0	0	0	0	0	0	1	hsa-miR-186-5p	-0.18	-0.19	N/A	2011
EED	ENST00000327320.4	embryonic ectoderm development	142	1	0	1	0	2	0	1	1	0	hsa-miR-186-5p	-0.18	-0.19	N/A	2007
BET1	ENST00000222547.3	Bet1 golgi vesicular membrane trafficking protein	722	1	1	0	0	3	1	1	1	3	hsa-miR-186-5p	-0.18	-0.56	N/A	2009, 2011
C7orf76	ENST00000356686.1	chromosome 7 open reading frame 76	5	1	1	0	0	1	0	1	0	2	hsa-miR-186-5p	-0.17	-0.17	N/A
ANO2	ENST00000327087.8	anoctamin 2	10	1	1	0	0	0	0	0	0	1	hsa-miR-186-5p	-0.17	-0.17	N/A	2009
CDK5R1	ENST00000313401.3	cyclin-dependent kinase 5, regulatory subunit 1 (p35)	335	3	1	2	0	1	0	0	1	3	hsa-miR-186-5p	-0.17	-0.17	N/A	2009, 2011
KHDRBS3	ENST00000355849.5	KH domain containing, RNA binding, signal transduction associated 3	11	1	0	1	0	1	0	1	0	0	hsa-miR-186-5p	-0.17	-0.18	N/A	2011
MRPS10	ENST00000053468.3	mitochondrial ribosomal protein S10	63	1	1	0	0	3	0	2	1	7	hsa-miR-186-5p	-0.17	-0.26	N/A
PGM3	ENST00000513973.1	phosphoglucomutase 3	707	1	1	0	0	2	0	1	1	2	hsa-miR-186-5p	-0.17	-0.18	N/A	2011
CDC73	ENST00000367435.3	cell division cycle 73	579	1	0	0	1	8	0	3	5	13	hsa-miR-186-5p	-0.16	-0.42	N/A	2011
NCBP2	ENST00000447325.1	nuclear cap binding protein subunit 2, 20kDa	4301	1	0	1	0	1	0	1	0	1	hsa-miR-186-5p	-0.16	-0.18	N/A	2011
LMO3	ENST00000354662.1	LIM domain only 3 (rhombotin-like 2)	7	1	0	1	0	1	0	1	0	5	hsa-miR-186-5p	-0.16	-0.17	N/A	2009, 2011
BMP5	ENST00000370830.3	bone morphogenetic protein 5	5	1	1	0	0	4	1	0	3	0	hsa-miR-186-5p	-0.16	-0.16	N/A
RORB	ENST00000376896.3	RAR-related orphan receptor B	5	1	0	1	0	3	1	1	1	5	hsa-miR-186-5p	-0.16	-0.16	N/A
SNRNP48	ENST00000342415.5	small nuclear ribonucleoprotein 48kDa (U11/U12)	423	1	1	0	0	1	0	0	1	1	hsa-miR-186-5p	-0.16	-0.21	N/A	2011
C4orf46	ENST00000508457.1	chromosome 4 open reading frame 46	128	1	0	1	0	3	0	3	0	3	hsa-miR-186-5p	-0.16	-0.22	N/A	2009, 2011
SALL1	ENST00000566102.1	sal-like 1 (Drosophila)	95	1	1	0	0	2	0	1	1	1	hsa-miR-186-5p	-0.16	-0.28	N/A	2007, 2011
C1QTNF3	ENST00000382065.3	C1q and tumor necrosis factor related protein 3	70	1	1	0	0	0	0	0	0	0	hsa-miR-186-5p	-0.16	-0.16	N/A	2011
ARCN1	ENST00000359415.4	archain 1	1139	2	1	1	0	0	0	0	0	3	hsa-miR-186-5p	-0.16	-0.16	N/A	2009, 2011
TEAD1	ENST00000361905.4	TEA domain family member 1 (SV40 transcriptional enhancer factor)	740	1	1	0	0	8	1	3	4	6	hsa-miR-186-5p	-0.16	-0.16	N/A	2009, 2011
RGS22	ENST00000360863.6	regulator of G-protein signaling 22	5	1	1	0	0	0	0	0	0	0	hsa-miR-186-5p	-0.15	-0.15	N/A	2009, 2011
ARHGAP5	ENST00000345122.3	Rho GTPase activating protein 5	757	1	1	0	0	3	1	1	1	4	hsa-miR-186-5p	-0.15	-0.24	N/A	2007, 2011
PPM1B	ENST00000409432.3	protein phosphatase, Mg2+/Mn2+ dependent, 1B	321	1	1	0	0	1	0	0	1	2	hsa-miR-186-5p	-0.15	-0.15	N/A	2011
RB1CC1	ENST00000025008.5	RB1-inducible coiled-coil 1	621	1	1	0	0	2	0	1	1	0	hsa-miR-186-5p	-0.15	-0.32	N/A	2009, 2011
DYNLRB1	ENST00000357156.2	dynein, light chain, roadblock-type 1	970	1	0	0	1	0	0	0	0	0	hsa-miR-186-5p	-0.15	-0.15	N/A	2011
CISD1	ENST00000333926.5	CDGSH iron sulfur domain 1	367	1	0	0	1	2	1	0	1	2	hsa-miR-186-5p	-0.15	-0.3	N/A
ERI1	ENST00000250263.7	exoribonuclease 1	120	1	0	1	0	2	0	1	1	3	hsa-miR-186-5p	-0.15	-0.15	N/A	2009, 2011
PTS	ENST00000525803.1	6-pyruvoyltetrahydropterin synthase	1526	1	0	0	1	0	0	0	0	1	hsa-miR-186-5p	-0.15	-0.15	N/A
TMF1	ENST00000398559.2	TATA element modulatory factor 1	349	3	1	2	0	1	0	1	0	2	hsa-miR-186-5p	-0.15	-0.16	N/A	2007, 2009, 2011
RNF125	ENST00000217740.3	ring finger protein 125, E3 ubiquitin protein ligase	214	3	0	3	0	1	0	1	0	6	hsa-miR-186-5p	-0.15	-0.15	N/A	2009, 2011
GYPA	ENST00000360771.4	glycophorin A (MNS blood group)	5	1	1	0	0	1	0	0	1	0	hsa-miR-186-5p	-0.14	-0.14	N/A	2009, 2011
GPR183	ENST00000376414.4	G protein-coupled receptor 183	112	1	1	0	0	2	0	2	0	1	hsa-miR-186-5p	-0.14	-0.19	N/A
APTX	ENST00000436040.2	aprataxin	310	1	0	1	0	1	0	1	0	1	hsa-miR-186-5p	-0.14	-0.15	N/A
ELOVL6	ENST00000394607.3	ELOVL fatty acid elongase 6	901	1	1	0	0	3	1	1	1	2	hsa-miR-186-5p	-0.14	-0.2	N/A	2009, 2011
PABPC1	ENST00000318607.5	poly(A) binding protein, cytoplasmic 1	95	2	1	0	1	0	0	0	0	3	hsa-miR-186-5p	-0.14	-0.14	N/A	2007, 2009, 2011
CDK6	ENST00000265734.4	cyclin-dependent kinase 6	1116	1	1	0	0	4	2	2	0	8	hsa-miR-186-5p	-0.14	-0.15	N/A	2009, 2011
NBEAL1	ENST00000449802.1	neurobeachin-like 1	42	1	0	1	0	7	0	4	3	5	hsa-miR-186-5p	-0.14	-0.15	N/A
PDE10A	ENST00000366882.1	phosphodiesterase 10A	371	1	1	0	0	10	2	3	5	2	hsa-miR-186-5p	-0.14	-0.2	N/A	2011
KDELR2	ENST00000258739.4	KDEL (Lys-Asp-Glu-Leu) endoplasmic reticulum protein retention receptor 2	5077	1	0	1	0	1	0	1	0	2	hsa-miR-186-5p	-0.14	-0.2	N/A	2009
EPC2	ENST00000258484.6	enhancer of polycomb homolog 2 (Drosophila)	152	1	1	0	0	0	0	0	0	2	hsa-miR-186-5p	-0.14	-0.14	N/A	2007, 2009, 2011
GJA3	ENST00000241125.3	gap junction protein, alpha 3, 46kDa	244	1	0	1	0	4	1	0	3	2	hsa-miR-186-5p	-0.14	-0.14	N/A	2011
TERF1	ENST00000276602.6	telomeric repeat binding factor (NIMA-interacting) 1	5	2	2	0	0	0	0	0	0	1	hsa-miR-186-5p	-0.13	-0.13	N/A	2009, 2011
NDFIP2	ENST00000218652.7	Nedd4 family interacting protein 2	1747	1	1	0	0	1	0	1	0	0	hsa-miR-186-5p	-0.13	-0.15	N/A
RSU1	ENST00000377921.3	Ras suppressor protein 1	10596	1	0	1	0	2	0	1	1	3	hsa-miR-186-5p	-0.13	-0.15	N/A
XIAP	ENST00000371199.3	X-linked inhibitor of apoptosis	153	2	1	1	0	0	0	0	0	4	hsa-miR-186-5p	-0.13	-0.2	N/A	2011
VEZT	ENST00000436874.1	vezatin, adherens junctions transmembrane protein	1054	1	1	0	0	2	0	1	1	5	hsa-miR-186-5p	-0.13	-0.18	N/A	2009, 2011
PSME3	ENST00000541124.1	proteasome (prosome, macropain) activator subunit 3 (PA28 gamma; Ki)	3605	2	0	2	0	1	0	0	1	1	hsa-miR-186-5p	-0.13	-0.33	N/A	2007, 2009, 2011
NRL	ENST00000397002.2	neural retina leucine zipper	9	1	1	0	0	0	0	0	0	0	hsa-miR-186-5p	-0.13	-0.26	N/A	2011
SPRYD7	ENST00000361840.3	SPRY domain containing 7	863	1	0	1	0	1	0	1	0	1	hsa-miR-186-5p	-0.13	-0.27	N/A	2009, 2011
DUSP13	ENST00000372702.3	dual specificity phosphatase 13	5	1	1	0	0	0	0	0	0	0	hsa-miR-186-5p	-0.13	-0.13	N/A	2009, 2011
ANO6	ENST00000320560.8	anoctamin 6	2262	2	0	2	0	1	0	1	0	0	hsa-miR-186-5p	-0.13	-0.13	N/A	2011
NXPH1	ENST00000405863.1	neurexophilin 1	5	1	1	0	0	0	0	0	0	1	hsa-miR-186-5p	-0.13	-0.13	N/A	2007
NKX2-1	ENST00000354822.5	NK2 homeobox 1	9	1	0	1	0	0	0	0	0	1	hsa-miR-186-5p	-0.13	-0.14	N/A	2009, 2011
SRSF9	ENST00000229390.3	serine/arginine-rich splicing factor 9	946	1	0	0	1	0	0	0	0	0	hsa-miR-186-5p	-0.13	-0.13	N/A
RIOK3	ENST00000339486.3	RIO kinase 3	757	1	1	0	0	1	0	1	0	1	hsa-miR-186-5p	-0.13	-0.13	N/A	2007, 2009, 2011
SLC16A9	ENST00000395348.3	solute carrier family 16, member 9	7	1	1	0	0	2	0	1	1	1	hsa-miR-186-5p	-0.12	-0.12	N/A	2009, 2011
CABS1	ENST00000273936.5	calcium-binding protein, spermatid-specific 1	5	1	0	1	0	0	0	0	0	0	hsa-miR-186-5p	-0.12	-0.12	N/A	2007, 2009, 2011
ALG14	ENST00000370205.5	ALG14, UDP-N-acetylglucosaminyltransferase subunit	572	1	0	1	0	6	0	2	4	6	hsa-miR-186-5p	-0.12	-0.21	N/A
CAMLG	ENST00000514518.1	calcium modulating ligand	458	1	0	1	0	1	1	0	0	2	hsa-miR-186-5p	-0.12	-0.31	N/A	2009, 2011
GPATCH2L	ENST00000553588.1	G patch domain containing 2-like	96	1	1	0	0	3	0	2	1	6	hsa-miR-186-5p	-0.12	-0.15	N/A
CADM2	ENST00000383699.3	cell adhesion molecule 2	5	2	2	0	0	2	1	0	1	10	hsa-miR-186-5p	-0.12	-0.12	N/A	2007, 2009, 2011
PXDC1	ENST00000380283.4	PX domain containing 1	1727	1	0	1	0	0	0	0	0	1	hsa-miR-186-5p	-0.12	-0.12	N/A	2007, 2009, 2011
ELK4	ENST00000357992.4	ELK4, ETS-domain protein (SRF accessory protein 1)	39	1	0	1	0	5	0	1	4	11	hsa-miR-186-5p	-0.12	-0.24	N/A
INTS2	ENST00000444766.3	integrator complex subunit 2	109	1	1	0	0	0	0	0	0	0	hsa-miR-186-5p	-0.12	-0.13	N/A	2007, 2009, 2011
GK5	ENST00000392993.2	glycerol kinase 5 (putative)	73	3	1	2	0	6	0	4	2	10	hsa-miR-186-5p	-0.12	-0.18	N/A	2011
GIPC2	ENST00000370759.3	GIPC PDZ domain containing family, member 2	16	1	0	1	0	3	0	1	2	3	hsa-miR-186-5p	-0.12	-0.14	N/A	2011
SNAPC3	ENST00000380821.3	small nuclear RNA activating complex, polypeptide 3, 50kDa	2406	1	1	0	0	6	1	2	3	2	hsa-miR-186-5p	-0.12	-0.17	N/A	2011
TMED7-TICAM2	ENST00000333314.3	TMED7-TICAM2 readthrough	202	1	1	0	0	0	0	0	0	3	hsa-miR-186-5p	-0.12	-0.31	N/A
AK3	ENST00000381809.3	adenylate kinase 3	323	1	1	0	0	2	0	1	1	2	hsa-miR-186-5p	-0.12	-0.14	N/A	2009, 2011
KLHL23	ENST00000392647.2	kelch-like family member 23	791	1	0	0	1	1	1	0	0	2	hsa-miR-186-5p	-0.12	-0.12	N/A
GTF2A2	ENST00000396060.2	general transcription factor IIA, 2, 12kDa	1068	1	0	0	1	0	0	0	0	0	hsa-miR-186-5p	-0.11	-0.12	N/A	2011
ONECUT2	ENST00000491143.2	one cut homeobox 2	847	2	1	1	0	7	0	3	4	12	hsa-miR-186-5p	-0.11	-0.15	N/A	2007, 2009, 2011
GINM1	ENST00000367419.5	glycoprotein integral membrane 1	428	1	0	0	1	1	0	0	1	0	hsa-miR-186-5p	-0.11	-0.12	N/A
AKAP5	ENST00000394718.4	A kinase (PRKA) anchor protein 5	75	1	0	1	0	4	0	1	3	6	hsa-miR-186-5p	-0.11	-0.12	N/A
FAR1	ENST00000354817.3	fatty acyl CoA reductase 1	814	1	0	1	0	0	0	0	0	4	hsa-miR-186-5p	-0.11	-0.12	N/A	2007, 2009, 2011
PPP1CC	ENST00000335007.5	protein phosphatase 1, catalytic subunit, gamma isozyme	3739	1	1	0	0	2	0	1	1	4	hsa-miR-186-5p	-0.11	-0.12	N/A	2007, 2011
SMIM8	ENST00000392863.1	small integral membrane protein 8	449	1	0	1	0	2	1	0	1	3	hsa-miR-186-5p	-0.11	-0.32	N/A
MAML2	ENST00000524717.1	mastermind-like 2 (Drosophila)	104	2	0	2	0	3	0	1	2	3	hsa-miR-186-5p	-0.11	-0.18	N/A
SLC17A8	ENST00000323346.5	solute carrier family 17 (vesicular glutamate transporter), member 8	5	1	1	0	0	0	0	0	0	0	hsa-miR-186-5p	-0.11	-0.11	N/A	2009, 2011
TICAM2	ENST00000408996.4	toll-like receptor adaptor molecule 2	202	1	1	0	0	0	0	0	0	3	hsa-miR-186-5p	-0.11	-0.28	N/A	2011
DENND5B	ENST00000389082.5	DENN/MADD domain containing 5B	832	1	0	0	1	3	0	1	2	2	hsa-miR-186-5p	-0.11	-0.12	N/A	2009, 2011
SP4	ENST00000222584.3	Sp4 transcription factor	131	1	1	0	0	3	0	1	2	2	hsa-miR-186-5p	-0.11	-0.11	N/A	2007, 2009, 2011
HMGN5	ENST00000358130.2	high mobility group nucleosome binding domain 5	46	1	0	0	1	1	0	0	1	0	hsa-miR-186-5p	-0.11	-0.12	N/A	2007, 2011
ZNF710	ENST00000268154.4	zinc finger protein 710	5	1	1	0	0	0	0	0	0	2	hsa-miR-186-5p	-0.11	-0.11	N/A	2011
ZNF608	ENST00000504926.1	zinc finger protein 608	22	1	1	0	0	0	0	0	0	2	hsa-miR-186-5p	-0.11	-0.11	N/A	2007, 2009, 2011
TCF21	ENST00000367882.4	transcription factor 21	552	1	0	0	1	0	0	0	0	3	hsa-miR-186-5p	-0.11	-0.11	N/A
DUSP7	ENST00000495880.1	dual specificity phosphatase 7	68	2	1	0	1	0	0	0	0	2	hsa-miR-186-5p	-0.11	-0.17	N/A	2011
ZCCHC11	ENST00000257177.4	zinc finger, CCHC domain containing 11	97	2	2	0	0	0	0	0	0	2	hsa-miR-186-5p	-0.11	-0.11	N/A	2007, 2009, 2011
ZFP36L2	ENST00000282388.3	ZFP36 ring finger protein-like 2	317	1	0	1	0	1	0	1	0	3	hsa-miR-186-5p	-0.11	-0.11	N/A	2011
UBR3	ENST00000272793.5	ubiquitin protein ligase E3 component n-recognin 3 (putative)	200	1	1	0	0	0	0	0	0	1	hsa-miR-186-5p	-0.11	-0.14	N/A
SYAP1	ENST00000380155.3	synapse associated protein 1	2689	2	0	1	1	2	0	0	2	5	hsa-miR-186-5p	-0.11	-0.15	N/A	2007, 2011
HCN1	ENST00000303230.4	hyperpolarization activated cyclic nucleotide-gated potassium channel 1	5	1	0	0	1	2	0	1	1	7	hsa-miR-186-5p	-0.11	-0.18	N/A
SORT1	ENST00000256637.6	sortilin 1	2111	2	1	0	1	3	0	1	2	3	hsa-miR-186-5p	-0.11	-0.12	N/A	2009, 2011
EFEMP1	ENST00000394555.2	EGF containing fibulin-like extracellular matrix protein 1	992	2	0	1	1	0	0	0	0	0	hsa-miR-186-5p	-0.1	-0.1	N/A	2007, 2009, 2011
AGO3	ENST00000373191.4	argonaute RISC catalytic component 3	198	1	0	1	0	14	1	8	5	19	hsa-miR-186-5p	-0.1	-0.36	N/A
CHIC1	ENST00000373504.6	cysteine-rich hydrophobic domain 1	16	1	1	0	0	1	0	0	1	5	hsa-miR-186-5p	-0.1	-0.14	N/A	2007, 2009, 2011
PDCD10	ENST00000392750.2	programmed cell death 10	638	1	0	1	0	1	0	0	1	0	hsa-miR-186-5p	-0.1	-0.19	N/A	2007, 2009, 2011
DNAJC27	ENST00000264711.2	DnaJ (Hsp40) homolog, subfamily C, member 27	41	1	1	0	0	1	0	0	1	3	hsa-miR-186-5p	-0.1	-0.12	N/A	2009, 2011
TRPC1	ENST00000273482.6	transient receptor potential cation channel, subfamily C, member 1	18	1	1	0	0	0	0	0	0	1	hsa-miR-186-5p	-0.1	-0.1	N/A	2007, 2009, 2011
XPOT	ENST00000332707.5	exportin, tRNA	887	1	0	0	1	3	0	1	2	2	hsa-miR-186-5p	-0.1	-0.11	N/A	2007
KLF12	ENST00000377669.2	Kruppel-like factor 12	251	1	0	1	0	4	1	3	0	6	hsa-miR-186-5p	-0.1	-0.11	N/A	2011
CLK4	ENST00000316308.4	CDC-like kinase 4	218	1	1	0	0	1	0	1	0	2	hsa-miR-186-5p	-0.1	-0.39	N/A	2007, 2009, 2011
SGPP2	ENST00000321276.7	sphingosine-1-phosphate phosphatase 2	182	1	0	1	0	2	0	0	2	1	hsa-miR-186-5p	-0.1	-0.15	N/A
MOSPD1	ENST00000370783.3	motile sperm domain containing 1	83	1	0	1	0	1	0	0	1	0	hsa-miR-186-5p	-0.1	-0.14	N/A	2007, 2011
KCNK13	ENST00000282146.4	potassium channel, subfamily K, member 13	11	1	1	0	0	0	0	0	0	2	hsa-miR-186-5p	-0.1	-0.1	N/A	2009, 2011
ALG11	ENST00000523764.1	ALG11, alpha-1,2-mannosyltransferase	121	1	0	1	0	0	0	0	0	1	hsa-miR-186-5p	-0.1	-0.11	N/A
BMP2K	ENST00000335016.5	BMP2 inducible kinase	164	1	1	0	0	3	0	1	2	5	hsa-miR-186-5p	-0.1	-0.1	N/A	2009, 2011
HELZ	ENST00000358691.5	helicase with zinc finger	571	1	0	1	0	4	2	2	0	6	hsa-miR-186-5p	-0.1	-0.13	N/A	2009, 2011
PDGFC	ENST00000502773.1	platelet derived growth factor C	238	1	0	1	0	0	0	0	0	1	hsa-miR-186-5p	-0.1	-0.1	N/A	2007, 2009, 2011
TMEM170B	ENST00000379426.1	transmembrane protein 170B	489	1	1	0	0	5	2	1	2	9	hsa-miR-186-5p	-0.1	-0.13	N/A	2009, 2011
CYCS	ENST00000305786.2	cytochrome c, somatic	320	1	1	0	0	0	0	0	0	2	hsa-miR-186-5p	-0.1	-0.1	N/A	2011
SOGA3	ENST00000556132.1	SOGA family member 3	95	1	0	1	0	5	0	3	2	7	hsa-miR-186-5p	-0.09	-0.1	N/A	2011
RBM7	ENST00000541475.1	RNA binding motif protein 7	46	1	0	0	1	2	0	1	1	8	hsa-miR-186-5p	-0.09	-0.12	N/A
DNAJB4	ENST00000370763.5	DnaJ (Hsp40) homolog, subfamily B, member 4	633	1	0	1	0	6	1	2	3	2	hsa-miR-186-5p	-0.09	-0.38	N/A
INO80D	ENST00000403263.1	INO80 complex subunit D	5	1	1	0	0	4	0	1	3	19	hsa-miR-186-5p	-0.09	-0.09	N/A	2009, 2011
TMOD1	ENST00000259365.4	tropomodulin 1	115	1	0	0	1	3	1	0	2	0	hsa-miR-186-5p	-0.09	-0.14	N/A	2007, 2009, 2011
RP11-625H11.1	ENST00000558940.1	Uncharacterized protein	5	1	0	1	0	0	0	0	0	0	hsa-miR-186-5p	-0.09	-0.09	N/A
FAM114A2	ENST00000351797.4	family with sequence similarity 114, member A2	385	1	1	0	0	2	1	1	0	5	hsa-miR-186-5p	-0.09	-0.22	N/A
RNF181	ENST00000441634.1	ring finger protein 181	329	2	0	1	1	1	0	0	1	2	hsa-miR-186-5p	-0.09	-0.29	N/A	2007
B3GAT2	ENST00000230053.6	beta-1,3-glucuronyltransferase 2 (glucuronosyltransferase S)	39	1	1	0	0	3	0	1	2	2	hsa-miR-186-5p	-0.09	-0.09	N/A
NUP35	ENST00000295119.4	nucleoporin 35kDa	210	1	0	1	0	0	0	0	0	3	hsa-miR-186-5p	-0.09	-0.1	N/A
FUT9	ENST00000302103.5	fucosyltransferase 9 (alpha (1,3) fucosyltransferase)	5	1	0	0	1	3	0	1	2	5	hsa-miR-186-5p	-0.09	-0.09	N/A	2009, 2011
CREBRF	ENST00000540014.1	CREB3 regulatory factor	24	3	2	1	0	3	0	1	2	7	hsa-miR-186-5p	-0.09	-0.12	N/A	2009, 2011
GPCPD1	ENST00000379019.4	glycerophosphocholine phosphodiesterase GDE1 homolog (S. cerevisiae)	155	1	1	0	0	1	0	0	1	0	hsa-miR-186-5p	-0.09	-0.1	N/A	2009, 2011
MACC1	ENST00000400331.5	metastasis associated in colon cancer 1	5	1	0	0	1	5	1	1	3	4	hsa-miR-186-5p	-0.09	-0.09	N/A	2009, 2011
KLHL31	ENST00000370905.3	kelch-like family member 31	16	1	0	1	0	4	2	0	2	3	hsa-miR-186-5p	-0.09	-0.1	N/A	2011
CISD2	ENST00000273986.4	CDGSH iron sulfur domain 2	13	1	0	1	0	1	0	0	1	6	hsa-miR-186-5p	-0.09	-0.14	N/A	2011
HOOK3	ENST00000307602.4	hook microtubule-tethering protein 3	403	2	1	1	0	5	0	2	3	16	hsa-miR-186-5p	-0.09	-0.12	N/A	2007, 2009, 2011
CNOT7	ENST00000361272.4	CCR4-NOT transcription complex, subunit 7	415	1	1	0	0	2	0	1	1	3	hsa-miR-186-5p	-0.09	-0.12	N/A
MAP2	ENST00000360351.4	microtubule-associated protein 2	68	1	1	0	0	4	2	0	2	4	hsa-miR-186-5p	-0.09	-0.11	N/A	2007, 2011
ATP6V1C2	ENST00000381661.3	ATPase, H+ transporting, lysosomal 42kDa, V1 subunit C2	8	1	1	0	0	0	0	0	0	0	hsa-miR-186-5p	-0.09	-0.14	N/A	2009, 2011
GOSR1	ENST00000225724.5	golgi SNAP receptor complex member 1	668	3	0	2	1	2	0	1	1	4	hsa-miR-186-5p	-0.09	-0.16	N/A	2009, 2011
AGFG1	ENST00000310078.8	ArfGAP with FG repeats 1	2019	1	0	1	0	2	1	1	0	5	hsa-miR-186-5p	-0.09	-0.09	N/A	2009
PHIP	ENST00000275034.4	pleckstrin homology domain interacting protein	668	1	0	1	0	6	0	2	4	2	hsa-miR-186-5p	-0.09	-0.1	N/A	2011
TMEM183A	ENST00000367242.3	transmembrane protein 183A	241	2	1	1	0	1	0	0	1	1	hsa-miR-186-5p	-0.09	-0.1	N/A	2009, 2011
ST13	ENST00000216218.3	suppression of tumorigenicity 13 (colon carcinoma) (Hsp70 interacting protein)	83	1	0	0	1	1	0	0	1	4	hsa-miR-186-5p	-0.09	-0.11	N/A
C8orf46	ENST00000522977.1	chromosome 8 open reading frame 46	6	1	0	1	0	0	0	0	0	0	hsa-miR-186-5p	-0.09	-0.09	N/A	2011
BTF3	ENST00000380591.3	basic transcription factor 3	417	1	0	1	0	0	0	0	0	2	hsa-miR-186-5p	-0.09	-0.09	N/A	2007, 2009
MITF	ENST00000328528.6	microphthalmia-associated transcription factor	593	3	1	2	0	1	0	1	0	4	hsa-miR-186-5p	-0.09	-0.09	N/A	2011
FAM105A	ENST00000274217.3	family with sequence similarity 105, member A	2613	1	1	0	0	3	0	1	2	1	hsa-miR-186-5p	-0.09	-0.13	N/A	2011
RAB21	ENST00000261263.3	RAB21, member RAS oncogene family	1823	2	0	1	1	6	0	1	5	5	hsa-miR-186-5p	-0.09	-0.24	N/A	2007, 2009, 2011
ZFP36L1	ENST00000555997.1	ZFP36 ring finger protein-like 1	231	1	0	1	0	0	0	0	0	3	hsa-miR-186-5p	-0.09	-0.1	N/A	2007, 2009, 2011
LIN7A	ENST00000552864.1	lin-7 homolog A (C. elegans)	86	1	1	0	0	1	0	0	1	3	hsa-miR-186-5p	-0.09	-0.1	N/A	2009, 2011
PARG	ENST00000402038.3	poly (ADP-ribose) glycohydrolase	445	1	0	1	0	4	0	2	2	4	hsa-miR-186-5p	-0.09	-0.13	N/A	2007, 2009
SRI	ENST00000265729.2	sorcin	278	1	0	1	0	2	0	1	1	0	hsa-miR-186-5p	-0.09	-0.13	N/A
RGPD6	ENST00000329516.3	RANBP2-like and GRIP domain containing 6	5	1	0	1	0	3	0	1	2	3	hsa-miR-186-5p	-0.09	-0.09	N/A
RAB6A	ENST00000310653.6	RAB6A, member RAS oncogene family	9	1	1	0	0	1	0	1	0	5	hsa-miR-186-5p	-0.08	-0.12	N/A	2007, 2011
PDK3	ENST00000441463.2	pyruvate dehydrogenase kinase, isozyme 3	659	1	0	1	0	8	0	5	3	3	hsa-miR-186-5p	-0.08	-0.15	N/A	2011
ZNF652	ENST00000362063.2	zinc finger protein 652	33	1	0	1	0	5	1	2	2	4	hsa-miR-186-5p	-0.08	-0.21	N/A	2009, 2011
NECAB1	ENST00000417640.2	N-terminal EF-hand calcium binding protein 1	5	1	1	0	0	2	0	1	1	0	hsa-miR-186-5p	-0.08	-0.08	N/A	2007, 2009, 2011
S100PBP	ENST00000373475.5	S100P binding protein	428	1	1	0	0	1	1	0	0	3	hsa-miR-186-5p	-0.08	-0.09	N/A	2009, 2011
CASP9	ENST00000546424.1	caspase 9, apoptosis-related cysteine peptidase	390	1	0	0	1	1	1	0	0	1	hsa-miR-186-5p	-0.08	-0.08	N/A
ATAD2	ENST00000287394.5	ATPase family, AAA domain containing 2	851	1	1	0	0	0	0	0	0	0	hsa-miR-186-5p	-0.08	-0.08	N/A	2011
WNT4	ENST00000290167.6	wingless-type MMTV integration site family, member 4	5	1	0	0	1	0	0	0	0	1	hsa-miR-186-5p	-0.08	-0.08	N/A	2009, 2011
RUNX1T1	ENST00000523629.1	runt-related transcription factor 1; translocated to, 1 (cyclin D-related)	9	1	1	0	0	4	0	1	3	1	hsa-miR-186-5p	-0.08	-0.08	N/A	2007, 2009, 2011
GPR128	ENST00000273352.3	G protein-coupled receptor 128	5	1	0	1	0	0	0	0	0	0	hsa-miR-186-5p	-0.08	-0.08	N/A	2011
TMEM168	ENST00000312814.6	transmembrane protein 168	195	1	1	0	0	4	1	2	1	3	hsa-miR-186-5p	-0.08	-0.14	N/A
ARIH1	ENST00000379887.4	ariadne RBR E3 ubiquitin protein ligase 1	671	1	1	0	0	0	0	0	0	5	hsa-miR-186-5p	-0.08	-0.13	N/A	2011
OTUD4	ENST00000454497.2	OTU domain containing 4	18	1	1	0	0	3	1	1	1	3	hsa-miR-186-5p	-0.08	-0.09	N/A	2007, 2009, 2011
WNK3	ENST00000375169.3	WNK lysine deficient protein kinase 3	55	3	1	2	0	1	0	0	1	6	hsa-miR-186-5p	-0.08	-0.08	N/A	2007, 2009, 2011
AC140061.12	ENST00000598429.1	Uncharacterized protein	11	1	0	1	0	1	0	0	1	2	hsa-miR-186-5p	-0.08	-0.08	N/A
ZC3H6	ENST00000343936.4	zinc finger CCCH-type containing 6	10	1	0	1	0	4	0	2	2	2	hsa-miR-186-5p	-0.08	-0.08	N/A	2009, 2011
RIMS2	ENST00000507740.1	regulating synaptic membrane exocytosis 2	8	1	1	0	0	5	0	0	5	7	hsa-miR-186-5p	-0.08	-0.08	N/A	2009, 2011
KIAA0087	ENST00000242109.3	KIAA0087	5	2	0	1	1	2	0	1	1	3	hsa-miR-186-5p	-0.08	-0.08	N/A
PEG3	ENST00000423103.2	paternally expressed 3	5	2	1	0	1	2	0	2	0	2	hsa-miR-186-5p	-0.08	-0.08	N/A	2011
SNX30	ENST00000374232.3	sorting nexin family member 30	33	3	1	0	2	2	1	0	1	2	hsa-miR-186-5p	-0.08	-0.14	N/A	2009, 2011
VGLL3	ENST00000398399.2	vestigial like 3 (Drosophila)	187	1	0	1	0	4	0	2	2	7	hsa-miR-186-5p	-0.08	-0.08	N/A	2009, 2011
FAM124B	ENST00000389874.3	family with sequence similarity 124B	5	1	1	0	0	0	0	0	0	0	hsa-miR-186-5p	-0.08	-0.08	N/A
KLF7	ENST00000423015.1	Kruppel-like factor 7 (ubiquitous)	737	2	1	1	0	3	0	2	1	11	hsa-miR-186-5p	-0.08	-0.1	N/A
NADK2	ENST00000397338.1	NAD kinase 2, mitochondrial	1039	1	1	0	0	0	0	0	0	3	hsa-miR-186-5p	-0.08	-0.12	N/A	2009, 2011
BTBD3	ENST00000254977.3	BTB (POZ) domain containing 3	3798	1	1	0	0	2	1	1	0	5	hsa-miR-186-5p	-0.08	-0.08	N/A	2007, 2009, 2011
ZBTB21	ENST00000398505.3	zinc finger and BTB domain containing 21	802	1	0	1	0	4	0	3	1	3	hsa-miR-186-5p	-0.08	-0.09	N/A	2009, 2011
NUP155	ENST00000231498.3	nucleoporin 155kDa	814	1	0	1	0	2	0	0	2	2	hsa-miR-186-5p	-0.08	-0.17	N/A
FHL5	ENST00000541107.1	four and a half LIM domains 5	5	1	0	1	0	2	0	1	1	1	hsa-miR-186-5p	-0.08	-0.11	N/A
DGKH	ENST00000261491.5	diacylglycerol kinase, eta	46	1	1	0	0	4	2	1	1	11	hsa-miR-186-5p	-0.08	-0.12	N/A
USP37	ENST00000258399.3	ubiquitin specific peptidase 37	14	1	1	0	0	9	1	5	3	7	hsa-miR-186-5p	-0.08	-0.2	N/A	2009, 2011
RBFOX2	ENST00000449924.2	RNA binding protein, fox-1 homolog (C. elegans) 2	262	1	0	1	0	3	0	3	0	8	hsa-miR-186-5p	-0.08	-0.14	N/A	2007, 2009, 2011
C5orf51	ENST00000381647.2	chromosome 5 open reading frame 51	124	1	1	0	0	1	0	0	1	9	hsa-miR-186-5p	-0.08	-0.08	N/A	2009, 2011
TMTC1	ENST00000256062.5	transmembrane and tetratricopeptide repeat containing 1	379	1	1	0	0	2	1	1	0	6	hsa-miR-186-5p	-0.08	-0.08	N/A	2009, 2011
CLVS2	ENST00000275162.5	clavesin 2	19	1	0	1	0	5	0	2	3	11	hsa-miR-186-5p	-0.08	-0.15	N/A
MAP7	ENST00000354570.3	microtubule-associated protein 7	444	2	1	0	1	1	1	0	0	5	hsa-miR-186-5p	-0.08	-0.13	N/A
MAN1A2	ENST00000356554.3	mannosidase, alpha, class 1A, member 2	603	1	0	0	1	5	1	1	3	3	hsa-miR-186-5p	-0.07	-0.1	N/A
FKBP14	ENST00000222803.5	FK506 binding protein 14, 22 kDa	939	1	0	1	0	2	0	1	1	4	hsa-miR-186-5p	-0.07	-0.09	N/A
TTBK2	ENST00000267890.6	tau tubulin kinase 2	18	1	0	1	0	3	1	1	1	1	hsa-miR-186-5p	-0.07	-0.08	N/A
MORC1	ENST00000232603.5	MORC family CW-type zinc finger 1	5	1	0	1	0	0	0	0	0	4	hsa-miR-186-5p	-0.07	-0.07	N/A	2011
IRX2	ENST00000382611.6	iroquois homeobox 2	5	1	1	0	0	0	0	0	0	0	hsa-miR-186-5p	-0.07	-0.07	N/A	2011
UBR2	ENST00000372883.3	ubiquitin protein ligase E3 component n-recognin 2	728	1	1	0	0	5	0	4	1	4	hsa-miR-186-5p	-0.07	-0.12	N/A	2011
TENM1	ENST00000371130.3	teneurin transmembrane protein 1	5	1	0	1	0	3	0	2	1	5	hsa-miR-186-5p	-0.07	-0.07	N/A	2007
LHFPL2	ENST00000515007.2	lipoma HMGIC fusion partner-like 2	16	1	1	0	0	1	0	1	0	2	hsa-miR-186-5p	-0.07	-0.13	N/A	2009, 2011
C4orf32	ENST00000309733.5	chromosome 4 open reading frame 32	325	2	0	1	1	3	0	2	1	8	hsa-miR-186-5p	-0.07	-0.23	N/A
ZNF706	ENST00000311212.4	zinc finger protein 706	325	1	1	0	0	3	0	2	1	1	hsa-miR-186-5p	-0.07	-0.41	N/A	2009, 2011
LPGAT1	ENST00000366997.4	lysophosphatidylglycerol acyltransferase 1	135	1	1	0	0	4	1	1	2	9	hsa-miR-186-5p	-0.07	-0.1	N/A	2009, 2011
LAMP2	ENST00000371335.4	lysosomal-associated membrane protein 2	3095	1	0	1	0	0	0	0	0	4	hsa-miR-186-5p	-0.07	-0.07	N/A	2011
EPN2	ENST00000314728.5	epsin 2	1609	1	1	0	0	2	0	1	1	1	hsa-miR-186-5p	-0.07	-0.07	N/A	2007, 2009, 2011
IMPG2	ENST00000193391.7	interphotoreceptor matrix proteoglycan 2	5	1	0	1	0	3	0	2	1	2	hsa-miR-186-5p	-0.07	-0.07	N/A
SLC30A8	ENST00000427715.2	solute carrier family 30 (zinc transporter), member 8	5	1	1	0	0	2	0	2	0	2	hsa-miR-186-5p	-0.07	-0.07	N/A
DARS	ENST00000264161.4	aspartyl-tRNA synthetase	361	1	0	1	0	1	0	1	0	2	hsa-miR-186-5p	-0.07	-0.12	N/A
SHANK2	ENST00000449833.2	SH3 and multiple ankyrin repeat domains 2	26	1	0	0	1	4	0	3	1	4	hsa-miR-186-5p	-0.07	-0.08	N/A	2007, 2009, 2011
REL	ENST00000295025.8	v-rel avian reticuloendotheliosis viral oncogene homolog	116	1	0	1	0	4	0	1	3	7	hsa-miR-186-5p	-0.07	-0.07	N/A
QKI	ENST00000392127.2	QKI, KH domain containing, RNA binding	323	3	2	1	0	6	1	1	4	8	hsa-miR-186-5p	-0.07	-0.17	N/A	2011
PAPD5	ENST00000357464.3	PAP associated domain containing 5	152	1	1	0	0	2	0	2	0	7	hsa-miR-186-5p	-0.07	-0.07	N/A	2007, 2009, 2011
AKIRIN1	ENST00000432648.3	akirin 1	798	1	0	1	0	3	0	2	1	2	hsa-miR-186-5p	-0.07	-0.08	N/A
RAB41	ENST00000374473.2	RAB41, member RAS oncogene family	5	1	0	1	0	2	0	0	2	2	hsa-miR-186-5p	-0.07	-0.12	N/A
C17orf104	ENST00000409122.2	chromosome 17 open reading frame 104	5	1	1	0	0	1	0	0	1	1	hsa-miR-186-5p	-0.07	-0.07	N/A
RP11-422N16.3	ENST00000499579.1	Uncharacterized protein	5	1	1	0	0	0	0	0	0	1	hsa-miR-186-5p	-0.07	-0.07	N/A
AFTPH	ENST00000238856.4	aftiphilin	6	1	0	1	0	0	0	0	0	0	hsa-miR-186-5p	-0.07	-0.07	N/A	2007, 2009, 2011
JAG1	ENST00000254958.5	jagged 1	421	1	0	1	0	1	0	0	1	1	hsa-miR-186-5p	-0.07	-0.07	N/A	2007, 2009, 2011
ASB7	ENST00000332783.7	ankyrin repeat and SOCS box containing 7	95	1	0	1	0	2	1	1	0	4	hsa-miR-186-5p	-0.07	-0.07	N/A	2011
KLHL11	ENST00000319121.3	kelch-like family member 11	16	1	0	0	1	2	0	2	0	2	hsa-miR-186-5p	-0.07	-0.1	N/A
JHDM1D	ENST00000397560.2	jumonji C domain containing histone demethylase 1 homolog D (S. cerevisiae)	470	1	0	1	0	3	0	2	1	5	hsa-miR-186-5p	-0.07	-0.07	N/A	2009, 2011
CENPK	ENST00000514814.1	centromere protein K	212	1	0	1	0	2	0	1	1	0	hsa-miR-186-5p	-0.07	-0.07	N/A	2009, 2011
ACTR3	ENST00000263238.2	ARP3 actin-related protein 3 homolog (yeast)	816	3	0	1	2	2	0	1	1	7	hsa-miR-186-5p	-0.07	-0.08	N/A
RBFOX1	ENST00000355637.4	RNA binding protein, fox-1 homolog (C. elegans) 1	5	2	0	2	0	0	0	0	0	4	hsa-miR-186-5p	-0.07	-0.07	N/A	2007, 2009, 2011
RP1-170O19.20	ENST00000470747.4	Uncharacterized protein	151	1	0	1	0	0	0	0	0	0	hsa-miR-186-5p	-0.07	-0.14	N/A
C18orf25	ENST00000282059.6	chromosome 18 open reading frame 25	688	1	0	0	1	3	0	2	1	7	hsa-miR-186-5p	-0.07	-0.07	N/A	2007, 2009, 2011
CNTNAP2	ENST00000361727.3	contactin associated protein-like 2	29	2	0	1	1	3	0	2	1	6	hsa-miR-186-5p	-0.07	-0.08	N/A	2007, 2009, 2011
NEGR1	ENST00000357731.5	neuronal growth regulator 1	28	1	1	0	0	4	0	3	1	5	hsa-miR-186-5p	-0.07	-0.1	N/A	2007, 2009, 2011
IDS	ENST00000422081.2	Iduronate 2-sulfatase (Hunter syndrome), isoform CRA_e; Iduronate 2-sulfatase 14 kDa chain; cDNA FLJ42669 fis, clone BRAMY2022168, highly similar to IDURONATE 2-SULFATASE	810	1	0	1	0	5	1	1	3	8	hsa-miR-186-5p	-0.07	-0.1	N/A
MBLAC2	ENST00000316610.6	metallo-beta-lactamase domain containing 2	498	2	0	2	0	2	0	1	1	2	hsa-miR-186-5p	-0.07	-0.07	N/A	2009, 2011
SNX27	ENST00000368843.3	sorting nexin family member 27	46	1	0	1	0	1	0	0	1	21	hsa-miR-186-5p	-0.07	-0.07	N/A	2007, 2009, 2011
ARPC2	ENST00000295685.10	actin related protein 2/3 complex, subunit 2, 34kDa	153	1	0	0	1	0	0	0	0	0	hsa-miR-186-5p	-0.06	-0.07	N/A
CHURC1	ENST00000548752.2	churchill domain containing 1	869	1	0	1	0	3	2	1	0	0	hsa-miR-186-5p	-0.06	-0.18	N/A
FOXK1	ENST00000328914.4	forkhead box K1	368	1	0	1	0	3	1	1	1	10	hsa-miR-186-5p	-0.06	-0.08	N/A	2009, 2011
TMEM35	ENST00000372930.4	transmembrane protein 35	372	1	0	1	0	1	0	0	1	0	hsa-miR-186-5p	-0.06	-0.06	N/A	2007, 2009, 2011
SCD	ENST00000370355.2	stearoyl-CoA desaturase (delta-9-desaturase)	9726	1	0	1	0	1	0	0	1	5	hsa-miR-186-5p	-0.06	-0.06	N/A	2009, 2011
BTD	ENST00000303498.5	biotinidase	183	2	1	1	0	4	0	2	2	2	hsa-miR-186-5p	-0.06	-0.11	N/A
EAF1	ENST00000396842.2	ELL associated factor 1	63	1	1	0	0	1	0	1	0	1	hsa-miR-186-5p	-0.06	-0.07	N/A	2011
KIAA0408	ENST00000483725.3	KIAA0408	95	1	0	1	0	3	0	2	1	6	hsa-miR-186-5p	-0.06	-0.07	N/A	2011
SPAST	ENST00000315285.3	spastin	239	2	1	1	0	1	0	0	1	4	hsa-miR-186-5p	-0.06	-0.09	N/A	2007, 2011
C6orf62	ENST00000378119.4	chromosome 6 open reading frame 62	300	1	0	1	0	0	0	0	0	2	hsa-miR-186-5p	-0.06	-0.06	N/A	2011
FGF7	ENST00000267843.4	fibroblast growth factor 7	5	1	0	0	1	0	0	0	0	5	hsa-miR-186-5p	-0.06	-0.06	N/A	2011
WDR44	ENST00000254029.3	WD repeat domain 44	392	1	1	0	0	2	0	1	1	2	hsa-miR-186-5p	-0.06	-0.07	N/A	2007, 2009, 2011
RORC	ENST00000356728.6	RAR-related orphan receptor C	42	1	1	0	0	0	0	0	0	0	hsa-miR-186-5p	-0.06	-0.07	N/A	2009, 2011
DYNLL2	ENST00000579991.2	dynein, light chain, LC8-type 2	1162	1	0	0	1	4	0	2	2	18	hsa-miR-186-5p	-0.06	-0.12	N/A
SEC62	ENST00000337002.4	SEC62 homolog (S. cerevisiae)	746	2	1	0	1	1	0	0	1	3	hsa-miR-186-5p	-0.06	-0.07	N/A	2007, 2009, 2011
PDE4D	ENST00000340635.6	phosphodiesterase 4D, cAMP-specific	747	1	0	1	0	5	0	2	3	4	hsa-miR-186-5p	-0.06	-0.09	N/A	2009, 2011
ERI2	ENST00000569729.1	ERI1 exoribonuclease family member 2	96	1	0	1	0	2	0	1	1	2	hsa-miR-186-5p	-0.06	-0.06	N/A
DEK	ENST00000397239.3	DEK oncogene	561	1	0	0	1	0	0	0	0	1	hsa-miR-186-5p	-0.06	-0.06	N/A	2007, 2009, 2011
BRWD3	ENST00000373275.4	bromodomain and WD repeat domain containing 3	506	1	1	0	0	4	1	2	1	10	hsa-miR-186-5p	-0.06	-0.11	N/A	2011
FAM126B	ENST00000418596.3	family with sequence similarity 126, member B	132	1	0	1	0	4	0	1	3	6	hsa-miR-186-5p	-0.06	-0.07	N/A	2011
SGMS2	ENST00000394684.4	sphingomyelin synthase 2	111	1	0	1	0	4	0	2	2	5	hsa-miR-186-5p	-0.06	-0.08	N/A	2011
SKP1	ENST00000353411.6	S-phase kinase-associated protein 1	416	1	1	0	0	1	0	0	1	6	hsa-miR-186-5p	-0.06	-0.09	N/A
FIGN	ENST00000333129.3	fidgetin	10	1	1	0	0	3	1	1	1	12	hsa-miR-186-5p	-0.06	-0.09	N/A
CEP57	ENST00000325542.5	centrosomal protein 57kDa	289	1	0	1	0	3	0	2	1	3	hsa-miR-186-5p	-0.06	-0.12	N/A
RPS6KA3	ENST00000379565.3	ribosomal protein S6 kinase, 90kDa, polypeptide 3	769	2	0	1	1	0	0	0	0	3	hsa-miR-186-5p	-0.06	-0.07	N/A	2007, 2009, 2011
PAK3	ENST00000372007.5	p21 protein (Cdc42/Rac)-activated kinase 3	8	1	1	0	0	3	0	0	3	8	hsa-miR-186-5p	-0.06	-0.06	N/A
MCFD2	ENST00000444761.2	multiple coagulation factor deficiency 2	1648	2	0	1	1	0	0	0	0	2	hsa-miR-186-5p	-0.06	-0.07	N/A	2007, 2009, 2011
TMCO1	ENST00000392129.6	transmembrane and coiled-coil domains 1	4447	1	0	1	0	1	0	0	1	5	hsa-miR-186-5p	-0.06	-0.07	N/A	2011
FAM117B	ENST00000392238.2	family with sequence similarity 117, member B	245	2	1	1	0	1	0	0	1	5	hsa-miR-186-5p	-0.06	-0.06	N/A	2011
PAPPA2	ENST00000367662.3	pappalysin 2	5	1	1	0	0	2	0	1	1	1	hsa-miR-186-5p	-0.06	-0.06	N/A
GCC2	ENST00000309863.6	GRIP and coiled-coil domain containing 2	5	1	0	1	0	3	0	1	2	2	hsa-miR-186-5p	-0.06	-0.06	N/A	2009, 2011
GRIA2	ENST00000296526.7	glutamate receptor, ionotropic, AMPA 2	5	1	1	0	0	1	1	0	0	1	hsa-miR-186-5p	-0.06	-0.06	N/A	2007, 2009, 2011
OCLN	ENST00000355237.2	occludin	5	1	1	0	0	2	0	1	1	2	hsa-miR-186-5p	-0.06	-0.06	N/A	2011
CGNL1	ENST00000281282.5	cingulin-like 1	25	1	0	0	1	3	0	2	1	2	hsa-miR-186-5p	-0.06	-0.06	N/A	2009, 2011
ZFAND3	ENST00000287218.4	zinc finger, AN1-type domain 3	86	1	0	1	0	1	0	0	1	0	hsa-miR-186-5p	-0.06	-0.11	N/A	2007, 2009, 2011
UNC45B	ENST00000268876.5	unc-45 homolog B (C. elegans)	5	1	0	1	0	2	1	0	1	3	hsa-miR-186-5p	-0.06	-0.06	N/A	2009, 2011
SHPRH	ENST00000367505.2	SNF2 histone linker PHD RING helicase, E3 ubiquitin protein ligase	757	1	0	1	0	2	0	2	0	3	hsa-miR-186-5p	-0.06	-0.06	N/A	2009, 2011
MCTP1	ENST00000515393.1	multiple C2 domains, transmembrane 1	81	1	1	0	0	1	0	0	1	2	hsa-miR-186-5p	-0.06	-0.07	N/A
RAD54L2	ENST00000409535.2	RAD54-like 2 (S. cerevisiae)	215	1	0	0	1	4	0	1	3	4	hsa-miR-186-5p	-0.06	-0.06	N/A
TMED8	ENST00000216468.7	transmembrane emp24 protein transport domain containing 8	53	1	0	1	0	3	0	0	3	6	hsa-miR-186-5p	-0.06	-0.07	N/A
SH3RF1	ENST00000284637.9	SH3 domain containing ring finger 1	2747	1	1	0	0	2	0	1	1	2	hsa-miR-186-5p	-0.06	-0.06	N/A	2007, 2009, 2011
SPTSSA	ENST00000298130.4	serine palmitoyltransferase, small subunit A	27	1	0	0	1	0	0	0	0	0	hsa-miR-186-5p	-0.06	-0.08	N/A	2009, 2011
G2E3	ENST00000206595.6	G2/M-phase specific E3 ubiquitin protein ligase	286	2	1	0	1	3	0	1	2	3	hsa-miR-186-5p	-0.06	-0.08	N/A	2011
NHLRC2	ENST00000369301.3	NHL repeat containing 2	368	1	0	1	0	4	0	2	2	4	hsa-miR-186-5p	-0.06	-0.08	N/A
IGSF11	ENST00000425327.2	immunoglobulin superfamily, member 11	5	2	0	1	1	0	0	0	0	1	hsa-miR-186-5p	-0.06	-0.06	N/A	2007, 2009, 2011
EIF3A	ENST00000369144.3	eukaryotic translation initiation factor 3, subunit A	638	2	1	1	0	1	0	0	1	4	hsa-miR-186-5p	-0.06	-0.06	N/A	2007, 2009, 2011
ZKSCAN3	ENST00000377255.3	zinc finger with KRAB and SCAN domains 3	63	1	1	0	0	2	0	1	1	0	hsa-miR-186-5p	-0.06	-0.06	N/A
LMBR1	ENST00000353442.5	limb development membrane protein 1	1435	1	0	1	0	1	0	0	1	6	hsa-miR-186-5p	-0.06	-0.07	N/A	2007
WIPI2	ENST00000288828.4	WD repeat domain, phosphoinositide interacting 2	1038	1	0	1	0	0	0	0	0	3	hsa-miR-186-5p	-0.06	-0.07	N/A	2009, 2011
AZIN1	ENST00000337198.5	antizyme inhibitor 1	2287	3	0	1	2	2	0	1	1	2	hsa-miR-186-5p	-0.06	-0.12	N/A
C21orf91	ENST00000400558.3	chromosome 21 open reading frame 91	998	1	0	1	0	2	1	0	1	6	hsa-miR-186-5p	-0.06	-0.06	N/A
NUCKS1	ENST00000367142.4	nuclear casein kinase and cyclin-dependent kinase substrate 1	1692	1	0	1	0	5	0	3	2	5	hsa-miR-186-5p	-0.06	-0.2	N/A	2011
CPEB3	ENST00000412050.4	cytoplasmic polyadenylation element binding protein 3	48	1	1	0	0	2	0	1	1	2	hsa-miR-186-5p	-0.06	-0.06	N/A	2007, 2009, 2011
LDHAL6A	ENST00000280706.2	lactate dehydrogenase A-like 6A	5	1	0	1	0	0	0	0	0	1	hsa-miR-186-5p	-0.06	-0.06	N/A
FGF5	ENST00000456523.3	fibroblast growth factor 5	1478	1	0	1	0	3	0	2	1	2	hsa-miR-186-5p	-0.06	-0.12	N/A
KRR1	ENST00000229214.4	KRR1, small subunit (SSU) processome component, homolog (yeast)	380	1	0	0	1	0	0	0	0	3	hsa-miR-186-5p	-0.06	-0.06	N/A	2011
CPD	ENST00000225719.4	carboxypeptidase D	1766	1	1	0	0	4	0	0	4	5	hsa-miR-186-5p	-0.06	-0.07	N/A	2009, 2011
PPTC7	ENST00000354300.3	PTC7 protein phosphatase homolog (S. cerevisiae)	817	1	0	1	0	3	0	2	1	4	hsa-miR-186-5p	-0.06	-0.08	N/A
SLAMF6	ENST00000368059.3	SLAM family member 6	5	1	1	0	0	1	0	0	1	1	hsa-miR-186-5p	-0.06	-0.06	N/A
MAPK6	ENST00000261845.5	mitogen-activated protein kinase 6	24	1	1	0	0	0	0	0	0	3	hsa-miR-186-5p	-0.06	-0.06	N/A	2009, 2011
KIAA1462	ENST00000375377.1	KIAA1462	360	1	1	0	0	1	1	0	0	9	hsa-miR-186-5p	-0.06	-0.06	N/A	2009, 2011
PTAR1	ENST00000377200.5	protein prenyltransferase alpha subunit repeat containing 1	161	2	0	2	0	3	0	2	1	7	hsa-miR-186-5p	-0.06	-0.09	N/A	2009, 2011
CDC5L	ENST00000371477.3	cell division cycle 5-like	115	1	0	1	0	3	1	0	2	4	hsa-miR-186-5p	-0.06	-0.07	N/A	2007
PTEN	ENST00000371953.3	phosphatase and tensin homolog	118	2	0	1	1	2	1	1	0	5	hsa-miR-186-5p	-0.06	-0.09	N/A
RAD23B	ENST00000358015.3	RAD23 homolog B (S. cerevisiae)	1012	1	0	1	0	1	0	0	1	1	hsa-miR-186-5p	-0.06	-0.06	N/A	2011
PRDX6	ENST00000340385.5	peroxiredoxin 6	27834	1	1	0	0	1	0	1	0	0	hsa-miR-186-5p	-0.06	-0.29	N/A	2009, 2011
ARMC10	ENST00000323716.3	armadillo repeat containing 10	147	1	0	0	1	0	0	0	0	6	hsa-miR-186-5p	-0.06	-0.07	N/A
LCOR	ENST00000371103.3	ligand dependent nuclear receptor corepressor	94	1	1	0	0	1	0	0	1	5	hsa-miR-186-5p	-0.06	-0.07	N/A	2011
PPP1R12B	ENST00000608999.1	protein phosphatase 1, regulatory subunit 12B	18	1	0	0	1	3	0	2	1	5	hsa-miR-186-5p	-0.06	-0.07	N/A
C15orf56	ENST00000319503.3	chromosome 15 open reading frame 56	5	1	1	0	0	1	0	1	0	2	hsa-miR-186-5p	-0.06	-0.06	N/A	2009, 2011
NCKAP5	ENST00000409261.1	NCK-associated protein 5	51	1	1	0	0	3	0	1	2	0	hsa-miR-186-5p	-0.05	-0.07	N/A	2009, 2011
PPIP5K2	ENST00000321521.9	diphosphoinositol pentakisphosphate kinase 2	203	1	0	0	1	4	0	3	1	16	hsa-miR-186-5p	-0.05	-0.12	N/A	2007
GCNT4	ENST00000322348.4	glucosaminyl (N-acetyl) transferase 4, core 2	19	1	0	1	0	4	0	2	2	4	hsa-miR-186-5p	-0.05	-0.08	N/A	2007
DKK1	ENST00000373970.3	dickkopf WNT signaling pathway inhibitor 1	2384	1	0	0	1	0	0	0	0	0	hsa-miR-186-5p	-0.05	-0.05	N/A	2009, 2011
TTC13	ENST00000366661.4	tetratricopeptide repeat domain 13	3928	1	0	0	1	0	0	0	0	1	hsa-miR-186-5p	-0.05	-0.05	N/A	2007, 2011
RNF217	ENST00000521654.2	ring finger protein 217	92	1	0	1	0	9	1	6	2	3	hsa-miR-186-5p	-0.05	-0.19	N/A
CDC42	ENST00000344548.3	cell division cycle 42	34	1	0	1	0	1	0	1	0	1	hsa-miR-186-5p	-0.05	-0.06	N/A	2007, 2009, 2011
PRKCA	ENST00000413366.3	protein kinase C, alpha	726	1	0	1	0	3	1	1	1	0	hsa-miR-186-5p	-0.05	-0.08	N/A	2011
PLEK	ENST00000234313.7	pleckstrin	5	1	1	0	0	0	0	0	0	1	hsa-miR-186-5p	-0.05	-0.05	N/A	2011
SMARCA5	ENST00000283131.3	SWI/SNF related, matrix associated, actin dependent regulator of chromatin, subfamily a, member 5	478	2	0	0	2	2	0	2	0	2	hsa-miR-186-5p	-0.05	-0.09	N/A	2007, 2011
MPLKIP	ENST00000306984.6	M-phase specific PLK1 interacting protein	32	1	1	0	0	2	1	1	0	2	hsa-miR-186-5p	-0.05	-0.11	N/A
ELF1	ENST00000442101.1	E74-like factor 1 (ets domain transcription factor)	466	1	0	1	0	1	0	1	0	1	hsa-miR-186-5p	-0.05	-0.05	N/A
CAST	ENST00000395812.2	calpastatin	4674	1	0	1	0	0	0	0	0	3	hsa-miR-186-5p	-0.05	-0.05	N/A	2007, 2009, 2011
SHOC2	ENST00000369452.4	soc-2 suppressor of clear homolog (C. elegans)	437	1	0	0	1	2	0	1	1	9	hsa-miR-186-5p	-0.05	-0.07	N/A
ZDHHC23	ENST00000330212.3	zinc finger, DHHC-type containing 23	10	1	0	0	1	0	0	0	0	0	hsa-miR-186-5p	-0.05	-0.07	N/A	2009, 2011
KIAA1324L	ENST00000450689.2	KIAA1324-like	181	1	1	0	0	0	0	0	0	3	hsa-miR-186-5p	-0.05	-0.06	N/A	2007, 2011
PURB	ENST00000395699.2	purine-rich element binding protein B	497	1	0	1	0	3	0	3	0	8	hsa-miR-186-5p	-0.05	-0.08	N/A	2007, 2009, 2011
FOXD1	ENST00000499003.3	forkhead box D1	423	1	1	0	0	4	0	1	3	4	hsa-miR-186-5p	-0.05	-0.08	N/A	2007, 2009, 2011
RPS15A	ENST00000576436.1	ribosomal protein S15a	24	1	0	1	0	0	0	0	0	3	hsa-miR-186-5p	-0.05	-0.05	N/A
NDN	ENST00000331837.4	necdin, melanoma antigen (MAGE) family member	5	1	0	1	0	0	0	0	0	0	hsa-miR-186-5p	-0.05	-0.05	N/A	2011
MAFG	ENST00000357736.4	v-maf avian musculoaponeurotic fibrosarcoma oncogene homolog G	5	1	0	0	1	1	0	1	0	2	hsa-miR-186-5p	-0.05	-0.05	N/A	2007, 2009, 2011
ZFYVE16	ENST00000338008.5	zinc finger, FYVE domain containing 16	388	1	1	0	0	3	0	2	1	2	hsa-miR-186-5p	-0.05	-0.08	N/A	2009, 2011
RAD18	ENST00000264926.2	RAD18 homolog (S. cerevisiae)	211	1	0	1	0	3	0	1	2	3	hsa-miR-186-5p	-0.05	-0.06	N/A	2011
SMC3	ENST00000361804.4	structural maintenance of chromosomes 3	15	1	0	1	0	1	0	1	0	4	hsa-miR-186-5p	-0.05	-0.06	N/A
LMAN1	ENST00000251047.5	lectin, mannose-binding, 1	2293	1	0	1	0	1	0	1	0	4	hsa-miR-186-5p	-0.05	-0.06	N/A
ITGA6	ENST00000375221.2	integrin, alpha 6	1328	1	1	0	0	3	0	0	3	2	hsa-miR-186-5p	-0.05	-0.06	N/A	2007
PAK7	ENST00000378423.1	p21 protein (Cdc42/Rac)-activated kinase 7	6	1	1	0	0	1	0	1	0	1	hsa-miR-186-5p	-0.05	-0.05	N/A	2007, 2011
TMEM132B	ENST00000299308.3	transmembrane protein 132B	5	1	0	1	0	2	0	1	1	5	hsa-miR-186-5p	-0.05	-0.05	N/A
TMEM236	ENST00000377495.1	transmembrane protein 236	5	1	0	1	0	1	1	0	0	2	hsa-miR-186-5p	-0.05	-0.05	N/A
PAX5	ENST00000358127.4	paired box 5	5	2	0	2	0	1	0	0	1	6	hsa-miR-186-5p	-0.05	-0.05	N/A
TDRD15	ENST00000405799.1	tudor domain containing 15	0	1	1	0	0	1	0	1	0	0	hsa-miR-186-5p	-0.05	-0.05	N/A
PTPN11	ENST00000351677.2	protein tyrosine phosphatase, non-receptor type 11	52	1	0	1	0	1	1	0	0	3	hsa-miR-186-5p	-0.05	-0.05	N/A	2011
ZBTB39	ENST00000300101.2	zinc finger and BTB domain containing 39	7	2	0	2	0	1	0	0	1	0	hsa-miR-186-5p	-0.05	-0.05	N/A	2007, 2009, 2011
EDA	ENST00000374553.2	ectodysplasin A	9	1	0	1	0	1	1	0	0	7	hsa-miR-186-5p	-0.05	-0.05	N/A	2009, 2011
COL6A6	ENST00000358511.6	collagen, type VI, alpha 6	5	1	1	0	0	1	0	1	0	3	hsa-miR-186-5p	-0.05	-0.05	N/A	2009, 2011
TMEM236	ENST00000480516.1		5	1	0	1	0	1	1	0	0	2	hsa-miR-186-5p	-0.05	-0.05	N/A
PSPC1	ENST00000338910.4	paraspeckle component 1	14	1	0	0	1	3	1	2	0	2	hsa-miR-186-5p	-0.05	-0.09	N/A	2007
PDE3B	ENST00000282096.4	phosphodiesterase 3B, cGMP-inhibited	258	1	1	0	0	4	0	2	2	3	hsa-miR-186-5p	-0.05	-0.09	N/A	2007, 2009, 2011
OXSR1	ENST00000311806.3	oxidative stress responsive 1	1790	1	1	0	0	1	0	1	0	6	hsa-miR-186-5p	-0.05	-0.05	N/A	2007, 2009, 2011
SYT11	ENST00000368324.4	synaptotagmin XI	750	1	0	0	1	2	0	2	0	4	hsa-miR-186-5p	-0.05	-0.05	N/A	2007, 2009, 2011
YIPF6	ENST00000462683.1	Yip1 domain family, member 6	888	1	1	0	0	3	0	1	2	5	hsa-miR-186-5p	-0.05	-0.08	N/A	2011
C16orf52	ENST00000542527.2	chromosome 16 open reading frame 52	102	1	0	1	0	3	0	2	1	2	hsa-miR-186-5p	-0.05	-0.08	N/A	2011
SCOC	ENST00000608372.1	short coiled-coil protein	922	1	0	0	1	3	1	0	2	3	hsa-miR-186-5p	-0.05	-0.1	N/A
PP13439	ENST00000331659.2		289	1	0	1	0	1	1	0	0	2	hsa-miR-186-5p	-0.05	-0.05	N/A
ZBTB8B	ENST00000609129.1	zinc finger and BTB domain containing 8B	18	1	0	1	0	2	0	1	1	6	hsa-miR-186-5p	-0.05	-0.07	N/A
IGF1	ENST00000337514.6	insulin-like growth factor 1 (somatomedin C)	19	1	0	0	1	3	0	1	2	7	hsa-miR-186-5p	-0.05	-0.2	N/A	2007, 2009, 2011
SYTL3	ENST00000367081.3	synaptotagmin-like 3	16	1	0	1	0	0	0	0	0	0	hsa-miR-186-5p	-0.05	-0.09	N/A
MAPK1	ENST00000215832.6	mitogen-activated protein kinase 1	630	1	0	1	0	1	0	1	0	1	hsa-miR-186-5p	-0.05	-0.06	N/A	2007, 2009, 2011
IL2	ENST00000226730.4	interleukin 2	5	1	0	1	0	0	0	0	0	0	hsa-miR-186-5p	-0.05	-0.05	N/A	2007, 2011
EIF2S2	ENST00000374980.2	eukaryotic translation initiation factor 2, subunit 2 beta, 38kDa	575	1	0	1	0	1	0	1	0	1	hsa-miR-186-5p	-0.05	-0.06	N/A	2007, 2011
KBTBD7	ENST00000379483.3	kelch repeat and BTB (POZ) domain containing 7	362	1	1	0	0	2	1	0	1	1	hsa-miR-186-5p	-0.05	-0.07	N/A
PARVA	ENST00000334956.8	parvin, alpha	1912	1	0	1	0	1	0	0	1	9	hsa-miR-186-5p	-0.05	-0.07	N/A	2011
ACAP2	ENST00000326793.6	ArfGAP with coiled-coil, ankyrin repeat and PH domains 2	253	1	0	1	0	2	0	1	1	3	hsa-miR-186-5p	-0.05	-0.05	N/A	2011
EIF4E3	ENST00000425534.3	eukaryotic translation initiation factor 4E family member 3	475	2	1	1	0	5	1	2	2	4	hsa-miR-186-5p	-0.05	-0.16	N/A	2007, 2009, 2011
C10orf118	ENST00000543782.1	chromosome 10 open reading frame 118	146	1	1	0	0	1	0	1	0	3	hsa-miR-186-5p	-0.05	-0.05	N/A	2009, 2011
PDE3A	ENST00000359062.3	phosphodiesterase 3A, cGMP-inhibited	1182	1	1	0	0	3	0	1	2	8	hsa-miR-186-5p	-0.05	-0.07	N/A
HERPUD2	ENST00000396081.1	HERPUD family member 2	30	2	0	0	2	1	0	1	0	3	hsa-miR-186-5p	-0.05	-0.06	N/A	2007
CREB3L2	ENST00000330387.6	cAMP responsive element binding protein 3-like 2	2872	1	1	0	0	1	0	1	0	3	hsa-miR-186-5p	-0.05	-0.05	N/A	2009, 2011
TBC1D12	ENST00000225235.4	TBC1 domain family, member 12	172	1	0	0	1	3	0	2	1	2	hsa-miR-186-5p	-0.05	-0.06	N/A	2009, 2011
FAM84A	ENST00000295092.2	family with sequence similarity 84, member A	69	2	2	0	0	2	0	2	0	7	hsa-miR-186-5p	-0.05	-0.1	N/A	2011
USF2	ENST00000594064.1	upstream transcription factor 2, c-fos interacting	1981	1	0	0	1	0	0	0	0	0	hsa-miR-186-5p	-0.04	-0.04	N/A	2007, 2009
SRGAP2	ENST00000414007.1	SLIT-ROBO Rho GTPase activating protein 2	98	1	1	0	0	1	0	1	0	1	hsa-miR-186-5p	-0.04	-0.05	N/A
SULT1C2	ENST00000251481.6	sulfotransferase family, cytosolic, 1C, member 2	16	1	0	1	0	2	0	1	1	2	hsa-miR-186-5p	-0.04	-0.07	N/A	2009, 2011
KCTD16	ENST00000507359.3	potassium channel tetramerization domain containing 16	36	1	0	1	0	7	1	5	1	6	hsa-miR-186-5p	-0.04	-0.16	N/A
CREG2	ENST00000324768.5	cellular repressor of E1A-stimulated genes 2	38	1	1	0	0	1	1	0	0	2	hsa-miR-186-5p	-0.04	-0.06	N/A	2011
UBQLN2	ENST00000338222.5	ubiquilin 2	70	1	0	1	0	1	0	0	1	1	hsa-miR-186-5p	-0.04	-0.04	N/A
SLC9B2	ENST00000503103.1	solute carrier family 9, subfamily B (NHA2, cation proton antiporter 2), member 2	22	1	1	0	0	2	0	0	2	1	hsa-miR-186-5p	-0.04	-0.07	N/A
LNPEP	ENST00000231368.5	leucyl/cystinyl aminopeptidase	28	1	0	0	1	8	1	5	2	12	hsa-miR-186-5p	-0.04	-0.27	N/A
PARD3B	ENST00000406610.2	par-3 family cell polarity regulator beta	38	1	1	0	0	1	0	0	1	3	hsa-miR-186-5p	-0.04	-0.04	N/A	2011
ACVR2B	ENST00000352511.4	activin A receptor, type IIB	21	1	0	0	1	6	0	2	4	7	hsa-miR-186-5p	-0.04	-0.1	N/A	2007, 2009, 2011
ENPEP	ENST00000265162.5	glutamyl aminopeptidase (aminopeptidase A)	10	2	1	1	0	0	0	0	0	2	hsa-miR-186-5p	-0.04	-0.05	N/A	2011
CYB5R4	ENST00000369681.5	cytochrome b5 reductase 4	329	1	0	1	0	2	1	0	1	6	hsa-miR-186-5p	-0.04	-0.08	N/A
PCSK1	ENST00000311106.3	proprotein convertase subtilisin/kexin type 1	83	1	0	0	1	1	0	1	0	3	hsa-miR-186-5p	-0.04	-0.1	N/A	2007, 2009, 2011
SERAC1	ENST00000367102.2	serine active site containing 1	129	1	0	1	0	2	0	0	2	2	hsa-miR-186-5p	-0.04	-0.05	N/A	2009, 2011
SPSB1	ENST00000328089.6	splA/ryanodine receptor domain and SOCS box containing 1	572	1	0	1	0	1	0	0	1	2	hsa-miR-186-5p	-0.04	-0.04	N/A	2007, 2009, 2011
CCNT2	ENST00000295238.6	cyclin T2	381	1	1	0	0	2	0	1	1	3	hsa-miR-186-5p	-0.04	-0.07	N/A	2007, 2011
PMEPA1	ENST00000341744.3	prostate transmembrane protein, androgen induced 1	736	1	0	1	0	1	0	1	0	3	hsa-miR-186-5p	-0.04	-0.07	N/A	2009, 2011
BICD2	ENST00000356884.6	bicaudal D homolog 2 (Drosophila)	38	1	1	0	0	2	0	2	0	1	hsa-miR-186-5p	-0.04	-0.07	N/A	2011
TSC22D2	ENST00000361875.3	TSC22 domain family, member 2	1062	1	1	0	0	4	0	2	2	7	hsa-miR-186-5p	-0.04	-0.09	N/A	2007, 2009, 2011
MAP4K3	ENST00000263881.3	mitogen-activated protein kinase kinase kinase kinase 3	796	1	1	0	0	1	0	0	1	1	hsa-miR-186-5p	-0.04	-0.04	N/A	2007
KCNJ15	ENST00000328656.4	potassium inwardly-rectifying channel, subfamily J, member 15	5	1	0	1	0	1	0	1	0	3	hsa-miR-186-5p	-0.04	-0.05	N/A
SIPA1L3	ENST00000222345.6	signal-induced proliferation-associated 1 like 3	1578	1	1	0	0	1	0	0	1	1	hsa-miR-186-5p	-0.04	-0.04	N/A	2009, 2011
FAM13A	ENST00000395002.2	family with sequence similarity 13, member A	441	1	0	1	0	1	0	1	0	0	hsa-miR-186-5p	-0.04	-0.04	N/A	2009, 2011
PCDH17	ENST00000377918.3	protocadherin 17	477	1	0	1	0	2	0	2	0	5	hsa-miR-186-5p	-0.04	-0.06	N/A
BPTF	ENST00000321892.4	bromodomain PHD finger transcription factor	7	1	0	1	0	1	0	1	0	4	hsa-miR-186-5p	-0.04	-0.04	N/A
GPR85	ENST00000297146.3	G protein-coupled receptor 85	21	1	1	0	0	1	0	0	1	0	hsa-miR-186-5p	-0.04	-0.04	N/A	2007, 2009, 2011
CNTN5	ENST00000524871.1	contactin 5	5	1	1	0	0	1	0	0	1	0	hsa-miR-186-5p	-0.04	-0.04	N/A	2009
OSER1	ENST00000372970.2	oxidative stress responsive serine-rich 1	1082	1	0	1	0	0	0	0	0	0	hsa-miR-186-5p	-0.04	-0.07	N/A
ASXL3	ENST00000269197.5	additional sex combs like 3 (Drosophila)	65	1	1	0	0	1	0	0	1	2	hsa-miR-186-5p	-0.04	-0.04	N/A
ATXN7	ENST00000295900.6	ataxin 7	264	1	0	1	0	1	0	1	0	1	hsa-miR-186-5p	-0.04	-0.04	N/A	2011
ZNF592	ENST00000299927.3	zinc finger protein 592	1128	1	0	1	0	3	2	0	1	2	hsa-miR-186-5p	-0.04	-0.09	N/A	2009, 2011
CCDC144A	ENST00000443444.2	coiled-coil domain containing 144A	5	1	0	1	0	2	0	0	2	3	hsa-miR-186-5p	-0.04	-0.04	N/A
SYT10	ENST00000228567.3	synaptotagmin X	5	1	0	1	0	2	0	0	2	2	hsa-miR-186-5p	-0.04	-0.04	N/A	2009, 2011
LPPR4	ENST00000370185.3	Lipid phosphate phosphatase-related protein type 4	5	1	0	1	0	2	0	0	2	0	hsa-miR-186-5p	-0.04	-0.04	N/A	2007
SNAP25	ENST00000254976.2	synaptosomal-associated protein, 25kDa	54	1	0	1	0	4	0	2	2	4	hsa-miR-186-5p	-0.04	-0.08	N/A
SYT6	ENST00000607941.1	synaptotagmin VI	5	1	1	0	0	1	0	0	1	2	hsa-miR-186-5p	-0.04	-0.04	N/A	2011
IGSF3	ENST00000369486.3	immunoglobulin superfamily, member 3	141	1	0	1	0	3	1	1	1	6	hsa-miR-186-5p	-0.04	-0.08	N/A	2009, 2011
ATP2B4	ENST00000367218.3	ATPase, Ca++ transporting, plasma membrane 4	7311	1	0	0	1	2	0	1	1	7	hsa-miR-186-5p	-0.04	-0.04	N/A	2007, 2009, 2011
STRN	ENST00000263918.4	striatin, calmodulin binding protein	476	1	0	1	0	2	1	0	1	8	hsa-miR-186-5p	-0.04	-0.06	N/A	2011
MFAP3L	ENST00000393704.3	microfibrillar-associated protein 3-like	69	1	1	0	0	1	0	0	1	2	hsa-miR-186-5p	-0.04	-0.04	N/A	2009, 2011
ZBTB8A	ENST00000316459.4	zinc finger and BTB domain containing 8A	287	2	1	1	0	0	0	0	0	4	hsa-miR-186-5p	-0.04	-0.05	N/A	2009, 2011
PHF21A	ENST00000257821.4	PHD finger protein 21A	301	1	0	1	0	2	0	0	2	5	hsa-miR-186-5p	-0.04	-0.04	N/A	2009, 2011
RP11-10A14.4	ENST00000518496.1	Uncharacterized protein	9	1	0	1	0	2	0	1	1	1	hsa-miR-186-5p	-0.04	-0.09	N/A
BRINP2	ENST00000361539.4	bone morphogenetic protein/retinoic acid inducible neural-specific 2	5	1	0	1	0	0	0	0	0	1	hsa-miR-186-5p	-0.04	-0.04	N/A	2007, 2009, 2011
OSBPL3	ENST00000313367.2	oxysterol binding protein-like 3	200	1	0	0	1	2	0	2	0	3	hsa-miR-186-5p	-0.04	-0.05	N/A	2009, 2011
DCP1A	ENST00000607628.1	decapping mRNA 1A	87	1	0	1	0	1	0	1	0	2	hsa-miR-186-5p	-0.04	-0.04	N/A	2011
PSMD11	ENST00000261712.3	proteasome (prosome, macropain) 26S subunit, non-ATPase, 11	189	1	0	1	0	1	0	0	1	5	hsa-miR-186-5p	-0.04	-0.04	N/A	2007
FAM83B	ENST00000306858.7	family with sequence similarity 83, member B	140	1	0	1	0	2	0	0	2	3	hsa-miR-186-5p	-0.04	-0.04	N/A
AFF1	ENST00000395146.4	AF4/FMR2 family, member 1	28	1	0	1	0	6	1	1	4	4	hsa-miR-186-5p	-0.04	-0.11	N/A	2009, 2011
SRPK2	ENST00000393651.3	SRSF protein kinase 2	381	1	1	0	0	3	0	0	3	0	hsa-miR-186-5p	-0.04	-0.06	N/A	2007, 2009, 2011
VAPB	ENST00000395802.3	VAMP (vesicle-associated membrane protein)-associated protein B and C	391	1	0	0	1	1	0	1	0	2	hsa-miR-186-5p	-0.04	-0.04	N/A
RRAGD	ENST00000369415.4	Ras-related GTP binding D	644	2	0	2	0	3	0	2	1	11	hsa-miR-186-5p	-0.04	-0.09	N/A	2011
TBCEL	ENST00000422003.2	tubulin folding cofactor E-like	89	1	0	1	0	3	0	1	2	4	hsa-miR-186-5p	-0.04	-0.07	N/A	2007
TULP4	ENST00000367094.2	tubby like protein 4	93	1	0	1	0	1	0	1	0	8	hsa-miR-186-5p	-0.04	-0.04	N/A	2009, 2011
FGF2	ENST00000264498.3	fibroblast growth factor 2 (basic)	123	1	1	0	0	1	0	1	0	2	hsa-miR-186-5p	-0.04	-0.06	N/A
NFAT5	ENST00000354436.2	nuclear factor of activated T-cells 5, tonicity-responsive	128	1	0	1	0	4	0	2	2	14	hsa-miR-186-5p	-0.04	-0.08	N/A	2007, 2009, 2011
SEPT7	ENST00000435235.1	septin 7	97	1	1	0	0	1	0	0	1	3	hsa-miR-186-5p	-0.04	-0.04	N/A	2007, 2009, 2011
BCL2L11	ENST00000393256.3	BCL2-like 11 (apoptosis facilitator)	105	1	0	1	0	1	0	1	0	1	hsa-miR-186-5p	-0.04	-0.04	N/A	2009, 2011
MEX3B	ENST00000558133.1	mex-3 RNA binding family member B	1401	1	0	1	0	0	0	0	0	0	hsa-miR-186-5p	-0.04	-0.04	N/A	2007, 2009, 2011
ZCCHC24	ENST00000372336.3	zinc finger, CCHC domain containing 24	359	1	1	0	0	0	0	0	0	0	hsa-miR-186-5p	-0.04	-0.04	N/A	2009, 2011
PIK3R3	ENST00000262741.5	phosphoinositide-3-kinase, regulatory subunit 3 (gamma)	335	1	0	1	0	1	0	1	0	0	hsa-miR-186-5p	-0.04	-0.04	N/A	2009, 2011
DSN1	ENST00000426836.1	DSN1, MIS12 kinetochore complex component	350	1	0	1	0	2	0	1	1	2	hsa-miR-186-5p	-0.04	-0.07	N/A	2009, 2011
SERINC3	ENST00000342374.4	serine incorporator 3	1218	1	0	0	1	2	1	0	1	2	hsa-miR-186-5p	-0.04	-0.05	N/A	2007
LAMP1	ENST00000332556.4	lysosomal-associated membrane protein 1	566	1	1	0	0	0	0	0	0	1	hsa-miR-186-5p	-0.04	-0.04	N/A	2009, 2011
CDC42BPA	ENST00000366767.3	CDC42 binding protein kinase alpha (DMPK-like)	122	1	0	1	0	1	0	1	0	2	hsa-miR-186-5p	-0.04	-0.04	N/A	2009, 2011
IPO5	ENST00000261574.5	importin 5	1826	1	0	0	1	2	0	1	1	3	hsa-miR-186-5p	-0.04	-0.08	N/A	2007, 2009, 2011
CLSTN2	ENST00000458420.3	calsyntenin 2	119	1	0	1	0	2	0	2	0	6	hsa-miR-186-5p	-0.04	-0.06	N/A
UBXN7	ENST00000296328.4	UBX domain protein 7	95	1	0	1	0	7*	0	1	5	9	hsa-miR-186-5p	-0.03	-0.09	N/A
NSD1	ENST00000439151.2	nuclear receptor binding SET domain protein 1	685	1	0	1	0	2	1	1	0	6	hsa-miR-186-5p	-0.03	-0.07	N/A	2011
ODF2L	ENST00000370566.3	outer dense fiber of sperm tails 2-like	149	1	0	1	0	2	0	0	2	2	hsa-miR-186-5p	-0.03	-0.07	N/A	2011
LRP12	ENST00000424843.2	low density lipoprotein receptor-related protein 12	378	1	1	0	0	3	1	1	1	1	hsa-miR-186-5p	-0.03	-0.17	N/A	2009
CNTNAP1	ENST00000264638.4	contactin associated protein 1	821	1	1	0	0	0	0	0	0	0	hsa-miR-186-5p	-0.03	-0.03	N/A	2007, 2009, 2011
RPA3	ENST00000223129.4	replication protein A3, 14kDa	1363	1	0	1	0	1	0	1	0	1	hsa-miR-186-5p	-0.03	-0.11	N/A
NPR3	ENST00000265074.8	natriuretic peptide receptor C/guanylate cyclase C (atrionatriuretic peptide receptor C)	517	1	1	0	0	1	0	0	1	3	hsa-miR-186-5p	-0.03	-0.04	N/A
CSNK2A1	ENST00000349736.5	casein kinase 2, alpha 1 polypeptide	1927	1	0	1	0	0	0	0	0	6	hsa-miR-186-5p	-0.03	-0.03	N/A	2007, 2009, 2011
CCDC80	ENST00000206423.3	coiled-coil domain containing 80	570	6	0	3	3	1	0	0	1	11	hsa-miR-186-5p	-0.03	-0.1	N/A
MSRB3	ENST00000308259.5	methionine sulfoxide reductase B3	83	1	0	0	1	1	0	1	0	3	hsa-miR-186-5p	-0.03	-0.06	N/A	2009, 2011
COBLL1	ENST00000375458.2	cordon-bleu WH2 repeat protein-like 1	70	1	1	0	0	3	0	3	0	3	hsa-miR-186-5p	-0.03	-0.09	N/A
SETD9	ENST00000285947.2	SET domain containing 9	45	1	0	1	0	3	0	1	2	2	hsa-miR-186-5p	-0.03	-0.16	N/A
NIPSNAP3B	ENST00000374762.3	nipsnap homolog 3B (C. elegans)	26	1	0	0	1	4	0	2	2	2	hsa-miR-186-5p	-0.03	-0.07	N/A
ARHGAP22	ENST00000249601.4	Rho GTPase activating protein 22	10	1	0	0	1	2	0	0	2	0	hsa-miR-186-5p	-0.03	-0.04	N/A
PIAS2	ENST00000585916.1	protein inhibitor of activated STAT, 2	194	1	0	1	0	3	1	2	0	7	hsa-miR-186-5p	-0.03	-0.1	N/A
ATL1	ENST00000358385.6	atlastin GTPase 1	55	1	0	1	0	0	0	0	0	1	hsa-miR-186-5p	-0.03	-0.14	N/A	2011
KIAA1468	ENST00000398130.2	KIAA1468	756	1	1	0	0	2	0	1	1	0	hsa-miR-186-5p	-0.03	-0.07	N/A
HAS2	ENST00000303924.4	hyaluronan synthase 2	398	1	0	1	0	1	1	0	0	4	hsa-miR-186-5p	-0.03	-0.06	N/A
FXR1	ENST00000357559.4	fragile X mental retardation, autosomal homolog 1	434	1	1	0	0	3	0	0	3	5	hsa-miR-186-5p	-0.03	-0.08	N/A	2009, 2011
KLHL24	ENST00000454652.2	kelch-like family member 24	143	1	0	1	0	3	1	1	1	2	hsa-miR-186-5p	-0.03	-0.08	N/A	2011
DHODH	ENST00000219240.4	dihydroorotate dehydrogenase (quinone)	152	1	0	1	0	1	1	0	0	2	hsa-miR-186-5p	-0.03	-0.05	N/A	2009, 2011
CEP41	ENST00000223208.5	centrosomal protein 41kDa	346	1	0	0	1	3	1	2	0	4	hsa-miR-186-5p	-0.03	-0.08	N/A	2007
CCDC171	ENST00000380701.3	coiled-coil domain containing 171	25	1	0	0	1	5	0	4	1	1	hsa-miR-186-5p	-0.03	-0.1	N/A
GCLM	ENST00000370238.3	glutamate-cysteine ligase, modifier subunit	809	1	0	1	0	2	0	1	1	0	hsa-miR-186-5p	-0.03	-0.05	N/A
FTO	ENST00000471389.1	fat mass and obesity associated	240	1	0	1	0	2	0	0	2	10	hsa-miR-186-5p	-0.03	-0.05	N/A
FAM120A	ENST00000333936.5	family with sequence similarity 120A	57	1	0	1	0	1	0	0	1	3	hsa-miR-186-5p	-0.03	-0.15	N/A	2007, 2009, 2011
SREK1	ENST00000334121.6	splicing regulatory glutamine/lysine-rich protein 1	316	1	0	0	1	3	0	1	2	7	hsa-miR-186-5p	-0.03	-0.07	N/A
RDH10	ENST00000240285.5	retinol dehydrogenase 10 (all-trans)	640	1	0	1	0	0	0	0	0	2	hsa-miR-186-5p	-0.03	-0.03	N/A
TERF2	ENST00000254942.3	telomeric repeat binding factor 2	709	2	0	1	1	0	0	0	0	4	hsa-miR-186-5p	-0.03	-0.03	N/A
CDKN1B	ENST00000228872.4	cyclin-dependent kinase inhibitor 1B (p27, Kip1)	587	1	0	0	1	0	0	0	0	1	hsa-miR-186-5p	-0.03	-0.03	N/A	2007
NKAP	ENST00000371410.3	NFKB activating protein	422	2	0	2	0	0	0	0	0	1	hsa-miR-186-5p	-0.03	-0.04	N/A
SESTD1	ENST00000428443.3	SEC14 and spectrin domains 1	478	1	1	0	0	3	0	2	1	10	hsa-miR-186-5p	-0.03	-0.11	N/A	2011
TMED7	ENST00000456936.3	transmembrane emp24 protein transport domain containing 7	1571	2	0	2	0	9	2	3	4	9	hsa-miR-186-5p	-0.03	-0.21	N/A	2007
TSPYL1	ENST00000368608.3	TSPY-like 1	2195	1	0	0	1	5	0	1	4	3	hsa-miR-186-5p	-0.03	-0.07	N/A	2007, 2011
JMY	ENST00000396137.4	junction mediating and regulatory protein, p53 cofactor	10	1	0	0	1	2	0	1	1	3	hsa-miR-186-5p	-0.03	-0.04	N/A	2011
MTF1	ENST00000373036.4	metal-regulatory transcription factor 1	98	1	0	0	1	1	0	1	0	6	hsa-miR-186-5p	-0.03	-0.03	N/A	2007, 2009, 2011
MTMR6	ENST00000381801.5	myotubularin related protein 6	838	1	1	0	0	0	0	0	0	1	hsa-miR-186-5p	-0.03	-0.03	N/A	2011
SETD8	ENST00000402868.3	SET domain containing (lysine methyltransferase) 8	52	1	1	0	0	0	0	0	0	0	hsa-miR-186-5p	-0.03	-0.03	N/A	2007, 2009, 2011
BCL11B	ENST00000357195.3	B-cell CLL/lymphoma 11B (zinc finger protein)	73	1	1	0	0	0	0	0	0	6	hsa-miR-186-5p	-0.03	-0.03	N/A	2007, 2009, 2011
KNDC1	ENST00000304613.3	kinase non-catalytic C-lobe domain (KIND) containing 1	5	1	1	0	0	0	0	0	0	0	hsa-miR-186-5p	-0.03	-0.03	N/A	2011
ZNF81	ENST00000338637.7	zinc finger protein 81	10	1	1	0	0	0	0	0	0	7	hsa-miR-186-5p	-0.03	-0.03	N/A	2009, 2011
JPH3	ENST00000284262.2	junctophilin 3	318	2	0	1	1	0	0	0	0	0	hsa-miR-186-5p	-0.03	-0.03	N/A	2007, 2009, 2011
FAM161A	ENST00000404929.1	family with sequence similarity 161, member A	275	1	0	1	0	1	0	0	1	2	hsa-miR-186-5p	-0.03	-0.03	N/A
NUS1	ENST00000368494.3	nuclear undecaprenyl pyrophosphate synthase 1 homolog (S. cerevisiae)	302	1	1	0	0	0	0	0	0	1	hsa-miR-186-5p	-0.03	-0.03	N/A	2007, 2009, 2011
WNT7A	ENST00000285018.4	wingless-type MMTV integration site family, member 7A	5	1	1	0	0	0	0	0	0	1	hsa-miR-186-5p	-0.03	-0.03	N/A
ZNF831	ENST00000371030.2	zinc finger protein 831	5	1	0	0	1	1	0	1	0	1	hsa-miR-186-5p	-0.03	-0.03	N/A	2009, 2011
PEG10	ENST00000482108.1	paternally expressed 10	8778	1	0	1	0	1	0	0	1	2	hsa-miR-186-5p	-0.03	-0.03	N/A	2009
ROCK1	ENST00000399799.2	Rho-associated, coiled-coil containing protein kinase 1	7	1	0	0	1	1	0	1	0	6	hsa-miR-186-5p	-0.03	-0.03	N/A
RAB3IP	ENST00000483530.2	RAB3A interacting protein	73	1	1	0	0	0	0	0	0	2	hsa-miR-186-5p	-0.03	-0.03	N/A	2009, 2011
ZNF449	ENST00000339249.4	zinc finger protein 449	345	1	1	0	0	1	0	1	0	1	hsa-miR-186-5p	-0.03	-0.05	N/A	2009, 2011
SMPD3	ENST00000219334.5	sphingomyelin phosphodiesterase 3, neutral membrane (neutral sphingomyelinase II)	9	1	0	1	0	1	0	0	1	2	hsa-miR-186-5p	-0.03	-0.03	N/A	2007, 2009, 2011
WWC3	ENST00000380861.4	WWC family member 3	11	1	0	1	0	1	0	0	1	2	hsa-miR-186-5p	-0.03	-0.03	N/A	2009, 2011
GRIN3A	ENST00000361820.3	glutamate receptor, ionotropic, N-methyl-D-aspartate 3A	5	1	0	1	0	1	0	0	1	1	hsa-miR-186-5p	-0.03	-0.03	N/A	2007, 2009, 2011
CADPS	ENST00000383710.4	Ca++-dependent secretion activator	5	1	1	0	0	0	0	0	0	1	hsa-miR-186-5p	-0.03	-0.03	N/A
ICK	ENST00000350082.5	intestinal cell (MAK-like) kinase	18	1	0	1	0	0	0	0	0	3	hsa-miR-186-5p	-0.03	-0.03	N/A	2009, 2011
PDS5B	ENST00000315596.10	PDS5, regulator of cohesion maintenance, homolog B (S. cerevisiae)	1493	1	1	0	0	0	0	0	0	6	hsa-miR-186-5p	-0.03	-0.03	N/A	2007, 2009, 2011
ACSBG1	ENST00000258873.4	acyl-CoA synthetase bubblegum family member 1	5	1	1	0	0	0	0	0	0	2	hsa-miR-186-5p	-0.03	-0.03	N/A
CRAMP1L	ENST00000397412.3	Crm, cramped-like (Drosophila)	731	1	1	0	0	0	0	0	0	1	hsa-miR-186-5p	-0.03	-0.03	N/A	2007, 2009, 2011
ZBTB7A	ENST00000322357.4	zinc finger and BTB domain containing 7A	37	1	1	0	0	0	0	0	0	2	hsa-miR-186-5p	-0.03	-0.03	N/A
SLC39A14	ENST00000381237.1	solute carrier family 39 (zinc transporter), member 14	2413	1	1	0	0	0	0	0	0	2	hsa-miR-186-5p	-0.03	-0.03	N/A
ZDBF2	ENST00000374423.3	zinc finger, DBF-type containing 2	102	1	0	1	0	1	0	0	1	2	hsa-miR-186-5p	-0.03	-0.03	N/A	2011
DLC1	ENST00000276297.4	deleted in liver cancer 1	970	1	0	1	0	1	0	1	0	2	hsa-miR-186-5p	-0.03	-0.04	N/A	2007, 2009, 2011
CDKN2AIP	ENST00000302350.4	CDKN2A interacting protein	2313	1	1	0	0	0	0	0	0	1	hsa-miR-186-5p	-0.03	-0.03	N/A
PAQR3	ENST00000512733.1	progestin and adipoQ receptor family member III	217	1	0	1	0	4	0	3	1	6	hsa-miR-186-5p	-0.03	-0.09	N/A
APBB2	ENST00000295974.8	amyloid beta (A4) precursor protein-binding, family B, member 2	704	1	1	0	0	2	1	1	0	2	hsa-miR-186-5p	-0.03	-0.08	N/A	2011
C2orf69	ENST00000319974.5	chromosome 2 open reading frame 69	82	1	0	0	1	1	0	1	0	2	hsa-miR-186-5p	-0.03	-0.03	N/A	2009, 2011
MYPN	ENST00000358913.5	myopalladin	73	1	0	0	1	4	1	2	1	10	hsa-miR-186-5p	-0.03	-0.13	N/A
ZBTB34	ENST00000319119.4	zinc finger and BTB domain containing 34	726	1	1	0	0	0	0	0	0	2	hsa-miR-186-5p	-0.03	-0.03	N/A	2009, 2011
FRMD4A	ENST00000358621.4	FERM domain containing 4A	192	1	0	1	0	2	0	1	1	2	hsa-miR-186-5p	-0.03	-0.05	N/A	2007, 2009, 2011
LHX4	ENST00000263726.2	LIM homeobox 4	13	1	1	0	0	3	0	1	2	4	hsa-miR-186-5p	-0.03	-0.07	N/A
CA5B	ENST00000454127.2	carbonic anhydrase VB, mitochondrial	245	2	0	1	1	1	0	0	1	3	hsa-miR-186-5p	-0.03	-0.04	N/A	2009, 2011
NEDD4	ENST00000338963.2	neural precursor cell expressed, developmentally down-regulated 4, E3 ubiquitin protein ligase	289	1	1	0	0	0	0	0	0	1	hsa-miR-186-5p	-0.03	-0.03	N/A	2009, 2011
PLXDC2	ENST00000377252.4	plexin domain containing 2	506	1	0	0	1	3	1	0	2	5	hsa-miR-186-5p	-0.03	-0.06	N/A
ABCC1	ENST00000399408.2	ATP-binding cassette, sub-family C (CFTR/MRP), member 1	441	1	0	1	0	1	0	0	1	5	hsa-miR-186-5p	-0.03	-0.03	N/A	2009, 2011
PDCD4	ENST00000280154.7	programmed cell death 4 (neoplastic transformation inhibitor)	612	1	1	0	0	0	0	0	0	3	hsa-miR-186-5p	-0.03	-0.05	N/A	2009, 2011
PRPF40A	ENST00000410080.1	PRP40 pre-mRNA processing factor 40 homolog A (S. cerevisiae)	459	1	0	0	1	1	0	1	0	1	hsa-miR-186-5p	-0.03	-0.05	N/A	2011
ZZZ3	ENST00000370801.3	zinc finger, ZZ-type containing 3	338	2	0	1	1	0	0	0	0	2	hsa-miR-186-5p	-0.03	-0.03	N/A	2007, 2009, 2011
HUNK	ENST00000270112.2	hormonally up-regulated Neu-associated kinase	85	1	1	0	0	1	0	0	1	4	hsa-miR-186-5p	-0.03	-0.04	N/A	2009, 2011
TRIM67	ENST00000444294.3	tripartite motif containing 67	41	1	0	1	0	2	0	1	1	3	hsa-miR-186-5p	-0.03	-0.05	N/A	2007, 2009, 2011
SDC2	ENST00000302190.4	syndecan 2	774	1	0	0	1	0	0	0	0	2	hsa-miR-186-5p	-0.03	-0.04	N/A	2007
SLC30A7	ENST00000370112.4	solute carrier family 30 (zinc transporter), member 7	204	1	1	0	0	5	0	3	2	3	hsa-miR-186-5p	-0.03	-0.11	N/A	2011
ATP1A2	ENST00000361216.3	ATPase, Na+/K+ transporting, alpha 2 polypeptide	5	1	0	0	1	0	0	0	0	4	hsa-miR-186-5p	-0.03	-0.03	N/A	2011
ATP9A	ENST00000311637.5	ATPase, class II, type 9A	1511	1	1	0	0	1	0	0	1	2	hsa-miR-186-5p	-0.03	-0.04	N/A	2009, 2011
HMGB1	ENST00000399489.1	high mobility group box 1	800	2	1	1	0	1	0	0	1	3	hsa-miR-186-5p	-0.03	-0.06	N/A
ZIC5	ENST00000267294.4	Zic family member 5	263	1	1	0	0	0	0	0	0	3	hsa-miR-186-5p	-0.03	-0.03	N/A	2007, 2011
FAM104A	ENST00000581110.1	family with sequence similarity 104, member A	2724	1	0	1	0	0	0	0	0	0	hsa-miR-186-5p	-0.03	-0.03	N/A	2007, 2009, 2011
FICD	ENST00000361549.2	FIC domain containing	54	1	1	0	0	0	0	0	0	3	hsa-miR-186-5p	-0.03	-0.03	N/A	2007, 2009, 2011
TIPARP	ENST00000295924.7	TCDD-inducible poly(ADP-ribose) polymerase	166	1	1	0	0	1	0	1	0	1	hsa-miR-186-5p	-0.03	-0.28	N/A	2011
WTIP	ENST00000590071.2	Wilms tumor 1 interacting protein	1303	1	0	0	1	1	0	1	0	4	hsa-miR-186-5p	-0.03	-0.05	N/A	2007, 2009, 2011
FAM126A	ENST00000409923.1	family with sequence similarity 126, member A	241	1	1	0	0	3	0	2	1	1	hsa-miR-186-5p	-0.03	-0.08	N/A	2009, 2011
SLC26A4	ENST00000265715.3	solute carrier family 26 (anion exchanger), member 4	5	1	0	1	0	0	0	0	0	1	hsa-miR-186-5p	-0.03	-0.03	N/A
EIF1AX	ENST00000379607.5	eukaryotic translation initiation factor 1A, X-linked	277	1	0	1	0	1	0	0	1	4	hsa-miR-186-5p	-0.03	-0.11	N/A
STON2	ENST00000267540.2	stonin 2	40	1	1	0	0	0	0	0	0	8	hsa-miR-186-5p	-0.03	-0.03	N/A
PTCHD1	ENST00000379361.4	patched domain containing 1	59	1	1	0	0	5	0	3	2	4	hsa-miR-186-5p	-0.03	-0.11	N/A	2007
CCND2	ENST00000261254.3	cyclin D2	66	1	1	0	0	0	0	0	0	9	hsa-miR-186-5p	-0.03	-0.03	N/A	2007, 2009, 2011
SATB1	ENST00000338745.6	SATB homeobox 1	312	2	0	1	1	1	0	0	1	2	hsa-miR-186-5p	-0.03	-0.04	N/A	2007, 2009, 2011
GLIPR1	ENST00000266659.3	GLI pathogenesis-related 1	623	2	1	1	0	2	1	1	0	3	hsa-miR-186-5p	-0.03	-0.1	N/A
CHRM3	ENST00000255380.4	cholinergic receptor, muscarinic 3	47	1	1	0	0	2	0	1	1	6	hsa-miR-186-5p	-0.03	-0.08	N/A
NR5A2	ENST00000367362.3	nuclear receptor subfamily 5, group A, member 2	121	1	1	0	0	0	0	0	0	0	hsa-miR-186-5p	-0.03	-0.03	N/A	2007, 2009, 2011
RSBN1L	ENST00000334955.8	round spermatid basic protein 1-like	640	1	0	1	0	1	0	0	1	4	hsa-miR-186-5p	-0.03	-0.04	N/A	2011
VPS37A	ENST00000324849.4	vacuolar protein sorting 37 homolog A (S. cerevisiae)	339	1	0	0	1	2	1	1	0	1	hsa-miR-186-5p	-0.03	-0.07	N/A	2011
KLB	ENST00000257408.4	klotho beta	95	1	0	1	0	2	1	0	1	0	hsa-miR-186-5p	-0.03	-0.06	N/A
CDK14	ENST00000380050.3	cyclin-dependent kinase 14	226	1	0	1	0	0	0	0	0	4	hsa-miR-186-5p	-0.03	-0.03	N/A	2009, 2011
JAG2	ENST00000331782.3	jagged 2	68	2	0	0	2	0	0	0	0	1	hsa-miR-186-5p	-0.03	-0.03	N/A	2007, 2009, 2011
SNX2	ENST00000379516.2	sorting nexin 2	397	1	0	0	1	4	0	2	2	1	hsa-miR-186-5p	-0.02	-0.1	N/A
C17orf85	ENST00000158149.3	chromosome 17 open reading frame 85	718	1	0	1	0	1	0	1	0	6	hsa-miR-186-5p	-0.02	-0.04	N/A
MLLT3	ENST00000380338.4	myeloid/lymphoid or mixed-lineage leukemia (trithorax homolog, Drosophila); translocated to, 3	385	1	0	0	1	1	0	1	0	6	hsa-miR-186-5p	-0.02	-0.04	N/A	2007
CHD9	ENST00000566029.1	chromodomain helicase DNA binding protein 9	447	1	0	1	0	1	0	0	1	2	hsa-miR-186-5p	-0.02	-0.03	N/A	2007, 2009, 2011
FNDC3B	ENST00000336824.4	fibronectin type III domain containing 3B	509	2	1	1	0	0	0	0	0	2	hsa-miR-186-5p	-0.02	-0.05	N/A	2007, 2009, 2011
ANKRD12	ENST00000262126.4	ankyrin repeat domain 12	11	1	0	0	1	1	0	1	0	2	hsa-miR-186-5p	-0.02	-0.03	N/A	2009, 2011
ABCC2	ENST00000370449.4	ATP-binding cassette, sub-family C (CFTR/MRP), member 2	39	2	0	2	0	1	0	1	0	1	hsa-miR-186-5p	-0.02	-0.06	N/A
SAMD8	ENST00000372687.4	sterile alpha motif domain containing 8	100	1	0	1	0	1	1	0	0	6	hsa-miR-186-5p	-0.02	-0.05	N/A	2011
TRHDE	ENST00000261180.4	thyrotropin-releasing hormone degrading enzyme	34	1	1	0	0	4	0	4	0	3	hsa-miR-186-5p	-0.02	-0.11	N/A
KPNA6	ENST00000373625.3	karyopherin alpha 6 (importin alpha 7)	272	1	0	0	1	1	0	1	0	4	hsa-miR-186-5p	-0.02	-0.03	N/A	2009, 2011
BMPR2	ENST00000374574.2	bone morphogenetic protein receptor, type II (serine/threonine kinase)	287	1	0	0	1	3	0	1	2	8	hsa-miR-186-5p	-0.02	-0.07	N/A	2007, 2009, 2011
CTDSPL2	ENST00000260327.4	CTD (carboxy-terminal domain, RNA polymerase II, polypeptide A) small phosphatase like 2	457	1	0	1	0	2	0	0	2	1	hsa-miR-186-5p	-0.02	-0.04	N/A	2007
MFSD6	ENST00000392328.1	major facilitator superfamily domain containing 6	47	1	0	1	0	1	0	1	0	4	hsa-miR-186-5p	-0.02	-0.04	N/A
C7orf55-LUC7L2	ENST00000354926.4	C7orf55-LUC7L2 readthrough	419	1	0	1	0	1	0	1	0	2	hsa-miR-186-5p	-0.02	-0.06	N/A
CUL3	ENST00000264414.4	cullin 3	1476	1	0	0	1	2	1	0	1	2	hsa-miR-186-5p	-0.02	-0.06	N/A	2009, 2011
PTGES3	ENST00000262033.6	prostaglandin E synthase 3 (cytosolic)	93	1	0	1	0	0	0	0	0	0	hsa-miR-186-5p	-0.02	-0.02	N/A	2007, 2011
PDE12	ENST00000311180.8	phosphodiesterase 12	326	1	1	0	0	0	0	0	0	9	hsa-miR-186-5p	-0.02	-0.03	N/A	2009, 2011
UBE2Q2	ENST00000267938.4	ubiquitin-conjugating enzyme E2Q family member 2	106	1	1	0	0	1	1	0	0	1	hsa-miR-186-5p	-0.02	-0.14	N/A	2011
METTL21A	ENST00000448823.2	methyltransferase like 21A	224	1	0	1	0	0	0	0	0	4	hsa-miR-186-5p	-0.02	-0.02	N/A
SCN9A	ENST00000409672.1	sodium channel, voltage-gated, type IX, alpha subunit	240	1	1	0	0	2	2	0	0	2	hsa-miR-186-5p	-0.02	-0.09	N/A	2011
SEC63	ENST00000369002.4	SEC63 homolog (S. cerevisiae)	3181	1	0	1	0	3	0	1	2	2	hsa-miR-186-5p	-0.02	-0.06	N/A	2011
GTDC1	ENST00000392869.2	glycosyltransferase-like domain containing 1	241	1	0	1	0	2	0	2	0	5	hsa-miR-186-5p	-0.02	-0.06	N/A	2007, 2009, 2011
MBD5	ENST00000407073.1	methyl-CpG binding domain protein 5	7	1	0	1	0	2	0	1	1	3	hsa-miR-186-5p	-0.02	-0.05	N/A	2009, 2011
UHRF1BP1L	ENST00000279907.7	UHRF1 binding protein 1-like	369	1	0	0	1	2	0	1	1	4	hsa-miR-186-5p	-0.02	-0.04	N/A
KIAA0355	ENST00000299505.6	KIAA0355	538	2	0	1	1	0	0	0	0	0	hsa-miR-186-5p	-0.02	-0.03	N/A	2007, 2009, 2011
SPATA5	ENST00000274008.4	spermatogenesis associated 5	168	1	0	1	0	0	0	0	0	2	hsa-miR-186-5p	-0.02	-0.03	N/A	2009, 2011
HPSE	ENST00000311412.5	heparanase	37	1	0	1	0	2	0	0	2	3	hsa-miR-186-5p	-0.02	-0.04	N/A
CREBBP	ENST00000262367.5	CREB binding protein	532	2	0	1	1	0	0	0	0	5	hsa-miR-186-5p	-0.02	-0.03	N/A	2007, 2009, 2011
BZW1	ENST00000409600.1	basic leucine zipper and W2 domains 1	470	1	0	1	0	1	0	1	0	1	hsa-miR-186-5p	-0.02	-0.04	N/A
SENP6	ENST00000541192.1	SUMO1/sentrin specific peptidase 6	298	1	1	0	0	1	0	0	1	2	hsa-miR-186-5p	-0.02	-0.11	N/A	2007, 2009, 2011
ERCC6L	ENST00000373657.1	excision repair cross-complementing rodent repair deficiency, complementation group 6-like	82	1	0	1	0	1	1	0	0	3	hsa-miR-186-5p	-0.02	-0.05	N/A
RNF216	ENST00000425013.2	ring finger protein 216	649	1	0	0	1	1	0	1	0	0	hsa-miR-186-5p	-0.02	-0.03	N/A	2009, 2011
SLC35A3	ENST00000465289.1	solute carrier family 35 (UDP-N-acetylglucosamine (UDP-GlcNAc) transporter), member A3	191	1	0	1	0	2	0	0	2	2	hsa-miR-186-5p	-0.02	-0.04	N/A
TLN1	ENST00000314888.9	talin 1	266	1	1	0	0	1	0	1	0	0	hsa-miR-186-5p	-0.02	-0.05	N/A
LUC7L2	ENST00000541515.3	LUC7-like 2 (S. cerevisiae)	419	1	0	1	0	1	0	1	0	2	hsa-miR-186-5p	-0.02	-0.05	N/A
ZCCHC4	ENST00000302874.4	zinc finger, CCHC domain containing 4	199	1	0	1	0	1	0	1	0	3	hsa-miR-186-5p	-0.02	-0.04	N/A	2009, 2011
BNC2	ENST00000380672.4	basonuclin 2	770	1	0	1	0	2	1	1	0	9	hsa-miR-186-5p	-0.02	-0.08	N/A	2009, 2011
NUDCD2	ENST00000302764.4	NudC domain containing 2	308	5	0	5	0	0	0	0	0	10	hsa-miR-186-5p	-0.02	-0.12	N/A
RFC1	ENST00000349703.2	replication factor C (activator 1) 1, 145kDa	205	1	0	1	0	1	0	1	0	0	hsa-miR-186-5p	-0.02	-0.04	N/A	2009, 2011
SOX11	ENST00000322002.3	SRY (sex determining region Y)-box 11	1100	1	1	0	0	3	1	0	2	7	hsa-miR-186-5p	-0.02	-0.1	N/A	2007, 2009, 2011
NSG2	ENST00000303177.3	Neuron-specific protein family member 2	5	1	0	1	0	0	0	0	0	2	hsa-miR-186-5p	-0.02	-0.02	N/A
SEC61A1	ENST00000243253.3	Sec61 alpha 1 subunit (S. cerevisiae)	2966	1	0	1	0	0	0	0	0	0	hsa-miR-186-5p	-0.02	-0.02	N/A	2009, 2011
FAM204A	ENST00000369183.4	family with sequence similarity 204, member A	296	1	1	0	0	4	1	1	2	1	hsa-miR-186-5p	-0.02	-0.13	N/A	2009, 2011
CNKSR3	ENST00000607772.1	CNKSR family member 3	567	1	0	1	0	8	2	3	3	11	hsa-miR-186-5p	-0.02	-0.17	N/A
AGPAT5	ENST00000285518.6	1-acylglycerol-3-phosphate O-acyltransferase 5	879	1	0	0	1	1	0	1	0	0	hsa-miR-186-5p	-0.02	-0.03	N/A	2009, 2011
IGF1R	ENST00000268035.6	insulin-like growth factor 1 receptor	561	1	1	0	0	0	0	0	0	3	hsa-miR-186-5p	-0.02	-0.03	N/A	2009, 2011
NAA15	ENST00000296543.5	N(alpha)-acetyltransferase 15, NatA auxiliary subunit	546	1	0	1	0	2	0	0	2	3	hsa-miR-186-5p	-0.02	-0.04	N/A	2007, 2009, 2011
DCAF10	ENST00000242323.7	DDB1 and CUL4 associated factor 10	433	1	1	0	0	0	0	0	0	4	hsa-miR-186-5p	-0.02	-0.05	N/A
OSBPL8	ENST00000393249.2	oxysterol binding protein-like 8	141	1	1	0	0	6	2	2	2	4	hsa-miR-186-5p	-0.02	-0.19	N/A	2007, 2009, 2011
TRPM7	ENST00000560955.1	transient receptor potential cation channel, subfamily M, member 7	281	1	0	1	0	1	0	1	0	3	hsa-miR-186-5p	-0.02	-0.04	N/A	2011
TMEM184A	ENST00000297477.5	transmembrane protein 184A	28	1	1	0	0	0	0	0	0	1	hsa-miR-186-5p	-0.02	-0.03	N/A	2009, 2011
ANKRD28	ENST00000399451.2	ankyrin repeat domain 28	798	1	0	0	1	1	0	1	0	2	hsa-miR-186-5p	-0.02	-0.03	N/A	2007, 2009, 2011
SRSF10	ENST00000343255.5	serine/arginine-rich splicing factor 10	1920	2	0	0	2	1	0	0	1	5	hsa-miR-186-5p	-0.02	-0.03	N/A	2007, 2009, 2011
EIF4E	ENST00000450253.2	eukaryotic translation initiation factor 4E	876	1	0	1	0	3	0	0	3	7	hsa-miR-186-5p	-0.02	-0.05	N/A	2007, 2009, 2011
SP3	ENST00000310015.6	Sp3 transcription factor	285	1	0	1	0	1	1	0	0	4	hsa-miR-186-5p	-0.02	-0.05	N/A	2007, 2011
POFUT2	ENST00000349485.5	protein O-fucosyltransferase 2	842	1	0	1	0	1	0	0	1	1	hsa-miR-186-5p	-0.02	-0.03	N/A	2011
SCAF8	ENST00000367178.3	SR-related CTD-associated factor 8	1917	1	0	1	0	1	0	1	0	1	hsa-miR-186-5p	-0.02	-0.04	N/A	2007
TGFBR2	ENST00000359013.4	transforming growth factor, beta receptor II (70/80kDa)	2168	1	0	1	0	3	1	1	1	5	hsa-miR-186-5p	-0.02	-0.08	N/A	2007, 2009, 2011
LRRTM3	ENST00000361320.4	leucine rich repeat transmembrane neuronal 3	5	1	0	1	0	1	0	1	0	4	hsa-miR-186-5p	-0.02	-0.06	N/A	2009, 2011
SLC5A12	ENST00000396005.3	solute carrier family 5 (sodium/monocarboxylate cotransporter), member 12	8	1	0	1	0	1	1	0	0	2	hsa-miR-186-5p	-0.02	-0.05	N/A
C9orf3	ENST00000297979.5	chromosome 9 open reading frame 3	1591	1	0	1	0	2	0	0	2	3	hsa-miR-186-5p	-0.02	-0.04	N/A	2009, 2011
PDS5A	ENST00000303538.8	PDS5, regulator of cohesion maintenance, homolog A (S. cerevisiae)	1518	1	0	1	0	0	0	0	0	1	hsa-miR-186-5p	-0.02	-0.02	N/A	2007, 2009, 2011
PHC1	ENST00000433083.2	polyhomeotic homolog 1 (Drosophila)	5	1	0	1	0	0	0	0	0	2	hsa-miR-186-5p	-0.02	-0.02	N/A	2009, 2011
PCDHA2	ENST00000526136.1	protocadherin alpha 2	86	1	0	1	0	0	0	0	0	1	hsa-miR-186-5p	-0.02	-0.02	N/A	2007, 2009, 2011
NCOA4	ENST00000452682.1	nuclear receptor coactivator 4	1665	1	0	1	0	0	0	0	0	2	hsa-miR-186-5p	-0.02	-0.02	N/A	2011
STOX2	ENST00000308497.4	storkhead box 2	379	1	0	1	0	0	0	0	0	1	hsa-miR-186-5p	-0.02	-0.02	N/A
RSPH10B2	ENST00000359718.3	radial spoke head 10 homolog B2 (Chlamydomonas)	5	1	0	1	0	0	0	0	0	1	hsa-miR-186-5p	-0.02	-0.02	N/A
PCDHA6	ENST00000529310.1	protocadherin alpha 6	86	1	0	1	0	0	0	0	0	1	hsa-miR-186-5p	-0.02	-0.02	N/A	2007, 2009, 2011
PCDHA13	ENST00000289272.2	protocadherin alpha 13	86	1	0	1	0	0	0	0	0	1	hsa-miR-186-5p	-0.02	-0.02	N/A	2007, 2009, 2011
NYAP2	ENST00000272907.6	neuronal tyrosine-phosphorylated phosphoinositide-3-kinase adaptor 2	5	1	0	1	0	0	0	0	0	4	hsa-miR-186-5p	-0.02	-0.02	N/A
RSPH10B	ENST00000539903.1	radial spoke head 10 homolog B (Chlamydomonas)	5	1	0	1	0	0	0	0	0	1	hsa-miR-186-5p	-0.02	-0.02	N/A
EHF	ENST00000257831.3	ets homologous factor	5	1	0	1	0	0	0	0	0	6	hsa-miR-186-5p	-0.02	-0.02	N/A
PCDHA11	ENST00000398640.2	protocadherin alpha 11	86	1	0	1	0	0	0	0	0	1	hsa-miR-186-5p	-0.02	-0.02	N/A	2009, 2011
ZC3H18	ENST00000301011.5	zinc finger CCCH-type containing 18	15	1	0	1	0	0	0	0	0	0	hsa-miR-186-5p	-0.02	-0.02	N/A	2007, 2009, 2011
BLMH	ENST00000261714.6	bleomycin hydrolase	1511	1	0	1	0	0	0	0	0	0	hsa-miR-186-5p	-0.02	-0.02	N/A	2009, 2011
PCDHA4	ENST00000530339.1	protocadherin alpha 4	86	1	0	1	0	0	0	0	0	1	hsa-miR-186-5p	-0.02	-0.02	N/A	2007, 2009, 2011
PSMD5	ENST00000210313.3	proteasome (prosome, macropain) 26S subunit, non-ATPase, 5	3846	1	0	1	0	0	0	0	0	3	hsa-miR-186-5p	-0.02	-0.02	N/A
NASP	ENST00000350030.3	nuclear autoantigenic sperm protein (histone-binding)	8	1	0	1	0	0	0	0	0	0	hsa-miR-186-5p	-0.02	-0.02	N/A	2007, 2009, 2011
EXD1	ENST00000314992.5	exonuclease 3'-5' domain containing 1	5	1	0	1	0	0	0	0	0	1	hsa-miR-186-5p	-0.02	-0.02	N/A	2011
CCNF	ENST00000397066.4	cyclin F	1432	1	0	1	0	0	0	0	0	0	hsa-miR-186-5p	-0.02	-0.02	N/A
EP300	ENST00000263253.7	E1A binding protein p300	785	1	0	1	0	0	0	0	0	1	hsa-miR-186-5p	-0.02	-0.02	N/A	2007, 2009, 2011
RBMX2	ENST00000305536.6	RNA binding motif protein, X-linked 2	139	1	0	1	0	0	0	0	0	3	hsa-miR-186-5p	-0.02	-0.02	N/A
FOXK2	ENST00000335255.5	forkhead box K2	450	1	0	0	1	1	0	0	1	1	hsa-miR-186-5p	-0.02	-0.02	N/A	2007, 2009, 2011
PCDHA1	ENST00000504120.2	protocadherin alpha 1	86	1	0	1	0	0	0	0	0	1	hsa-miR-186-5p	-0.02	-0.02	N/A	2007, 2009, 2011
DIRAS2	ENST00000375765.3	DIRAS family, GTP-binding RAS-like 2	5	1	0	1	0	1	0	1	0	4	hsa-miR-186-5p	-0.02	-0.04	N/A	2009, 2011
AQPEP	ENST00000357872.4	Aminopeptidase Q	11	1	0	1	0	0	0	0	0	0	hsa-miR-186-5p	-0.02	-0.02	N/A	2009, 2011
SENP7	ENST00000394095.2	SUMO1/sentrin specific peptidase 7	342	1	0	1	0	0	0	0	0	1	hsa-miR-186-5p	-0.02	-0.02	N/A	2009
MYT1	ENST00000328439.1	myelin transcription factor 1	12	1	0	1	0	0	0	0	0	2	hsa-miR-186-5p	-0.02	-0.02	N/A	2007, 2009, 2011
RNF11	ENST00000242719.3	ring finger protein 11	5881	1	0	1	0	0	0	0	0	5	hsa-miR-186-5p	-0.02	-0.02	N/A	2007, 2011
PCDHA10	ENST00000307360.5	protocadherin alpha 10	86	1	0	1	0	0	0	0	0	1	hsa-miR-186-5p	-0.02	-0.02	N/A	2007, 2009, 2011
DOCK3	ENST00000266037.9	dedicator of cytokinesis 3	47	1	0	1	0	0	0	0	0	3	hsa-miR-186-5p	-0.02	-0.02	N/A	2011
PCDHA7	ENST00000525929.1	protocadherin alpha 7	86	1	0	1	0	0	0	0	0	1	hsa-miR-186-5p	-0.02	-0.02	N/A	2007, 2009, 2011
TMEM151B	ENST00000451188.2	transmembrane protein 151B	5	1	0	1	0	0	0	0	0	1	hsa-miR-186-5p	-0.02	-0.02	N/A	2011
KIAA1614	ENST00000367588.4	KIAA1614	5	1	0	1	0	0	0	0	0	0	hsa-miR-186-5p	-0.02	-0.02	N/A
FRMD4B	ENST00000398540.3	FERM domain containing 4B	12	1	0	1	0	0	0	0	0	1	hsa-miR-186-5p	-0.02	-0.02	N/A	2009, 2011
PCDHAC2	ENST00000289269.5	protocadherin alpha subfamily C, 2	86	1	0	1	0	0	0	0	0	1	hsa-miR-186-5p	-0.02	-0.02	N/A	2007, 2009, 2011
PCDHA12	ENST00000398631.2	protocadherin alpha 12	86	1	0	1	0	0	0	0	0	1	hsa-miR-186-5p	-0.02	-0.02	N/A	2007, 2009, 2011
RAB7L1	ENST00000367139.3	RAB7, member RAS oncogene family-like 1	61	1	0	1	0	0	0	0	0	0	hsa-miR-186-5p	-0.02	-0.02	N/A
KCNB1	ENST00000371741.4	potassium voltage-gated channel, Shab-related subfamily, member 1	5	1	0	0	1	1	0	0	1	7	hsa-miR-186-5p	-0.02	-0.02	N/A
PCDHA3	ENST00000522353.2	protocadherin alpha 3	86	1	0	1	0	0	0	0	0	1	hsa-miR-186-5p	-0.02	-0.02	N/A	2007, 2009, 2011
PCDHA5	ENST00000529859.1	protocadherin alpha 5	86	1	0	1	0	0	0	0	0	1	hsa-miR-186-5p	-0.02	-0.02	N/A	2007, 2009, 2011
PLEKHA3	ENST00000234453.5	pleckstrin homology domain containing, family A (phosphoinositide binding specific) member 3	767	1	0	1	0	8	2	3	3	12	hsa-miR-186-5p	-0.02	-0.19	N/A
KRT77	ENST00000341809.3	keratin 77	5	1	0	1	0	0	0	0	0	0	hsa-miR-186-5p	-0.02	-0.02	N/A
MYT1L	ENST00000399161.2	myelin transcription factor 1-like	5	1	0	1	0	0	0	0	0	1	hsa-miR-186-5p	-0.02	-0.02	N/A	2007, 2009, 2011
PCDHA8	ENST00000531613.1	protocadherin alpha 8	86	1	0	1	0	0	0	0	0	1	hsa-miR-186-5p	-0.02	-0.02	N/A	2007, 2009, 2011
CCDC30	ENST00000342022.4	coiled-coil domain containing 30	6	1	0	1	0	0	0	0	0	2	hsa-miR-186-5p	-0.02	-0.02	N/A
TLR3	ENST00000296795.3	toll-like receptor 3	5	1	0	1	0	0	0	0	0	0	hsa-miR-186-5p	-0.02	-0.02	N/A
PCDHAC1	ENST00000253807.2	protocadherin alpha subfamily C, 1	86	1	0	1	0	0	0	0	0	1	hsa-miR-186-5p	-0.02	-0.02	N/A	2007, 2009, 2011
MIER1	ENST00000357692.2	mesoderm induction early response 1, transcriptional regulator	950	1	0	1	0	1	0	0	1	3	hsa-miR-186-5p	-0.02	-0.04	N/A	2011
PALD1	ENST00000263563.6	phosphatase domain containing, paladin 1	108	1	0	1	0	0	0	0	0	1	hsa-miR-186-5p	-0.02	-0.02	N/A	2011
FAM178A	ENST00000238961.4	family with sequence similarity 178, member A	130	1	0	1	0	0	0	0	0	3	hsa-miR-186-5p	-0.02	-0.02	N/A
GPR12	ENST00000405846.3	G protein-coupled receptor 12	5	1	0	1	0	0	0	0	0	4	hsa-miR-186-5p	-0.02	-0.02	N/A	2011
PCDHA9	ENST00000532602.1	protocadherin alpha 9	86	1	0	1	0	0	0	0	0	1	hsa-miR-186-5p	-0.02	-0.02	N/A	2011
ZNF385A	ENST00000551109.1	zinc finger protein 385A	94	1	0	1	0	0	0	0	0	0	hsa-miR-186-5p	-0.02	-0.02	N/A	2007, 2009, 2011
CCZ1B	ENST00000316731.8	CCZ1 vacuolar protein trafficking and biogenesis associated homolog B (S. cerevisiae)	5	1	0	1	0	0	0	0	0	0	hsa-miR-186-5p	-0.02	-0.02	N/A
MORC2	ENST00000397641.3	MORC family CW-type zinc finger 2	216	1	0	1	0	0	0	0	0	1	hsa-miR-186-5p	-0.02	-0.02	N/A	2007
ARHGAP42	ENST00000524892.2	Rho GTPase activating protein 42	36	1	0	1	0	0	0	0	0	3	hsa-miR-186-5p	-0.02	-0.02	N/A	2011
SNX18	ENST00000343017.6	sorting nexin 18	174	1	0	1	0	0	0	0	0	2	hsa-miR-186-5p	-0.02	-0.02	N/A
DPP9	ENST00000594671.1	dipeptidyl-peptidase 9	422	1	0	1	0	0	0	0	0	0	hsa-miR-186-5p	-0.02	-0.02	N/A	2007, 2009, 2011
DIXDC1	ENST00000440460.2	DIX domain containing 1	307	1	0	1	0	0	0	0	0	5	hsa-miR-186-5p	-0.02	-0.02	N/A	2009, 2011
PUM2	ENST00000338086.5	pumilio RNA-binding family member 2	1047	1	0	1	0	0	0	0	0	3	hsa-miR-186-5p	-0.02	-0.02	N/A	2011
MDFIC	ENST00000393486.1	MyoD family inhibitor domain containing	601	1	1	0	0	2	0	1	1	6	hsa-miR-186-5p	-0.02	-0.07	N/A
AKAP1	ENST00000337714.3	A kinase (PRKA) anchor protein 1	843	1	0	1	0	0	0	0	0	4	hsa-miR-186-5p	-0.02	-0.02	N/A
NDRG3	ENST00000373803.2	NDRG family member 3	960	1	0	1	0	0	0	0	0	0	hsa-miR-186-5p	-0.02	-0.02	N/A	2009, 2011
MTSS1L	ENST00000338779.6	metastasis suppressor 1-like	2982	1	0	1	0	0	0	0	0	2	hsa-miR-186-5p	-0.02	-0.02	N/A	2007, 2009, 2011
UBE2W	ENST00000517608.1	ubiquitin-conjugating enzyme E2W (putative)	102	1	0	0	1	1	0	0	1	8	hsa-miR-186-5p	-0.02	-0.04	N/A	2007, 2009, 2011
CHMP4C	ENST00000297265.4	charged multivesicular body protein 4C	398	1	0	1	0	0	0	0	0	0	hsa-miR-186-5p	-0.02	-0.02	N/A
CASK	ENST00000421587.2	calcium/calmodulin-dependent serine protein kinase (MAGUK family)	892	1	0	1	0	3	0	2	1	8	hsa-miR-186-5p	-0.02	-0.07	N/A	2011
EMP2	ENST00000359543.3	epithelial membrane protein 2	1725	1	0	1	0	1	0	0	1	3	hsa-miR-186-5p	-0.02	-0.03	N/A	2011
ATP8A2	ENST00000381655.2	ATPase, aminophospholipid transporter, class I, type 8A, member 2	22	1	0	1	0	1	0	1	0	4	hsa-miR-186-5p	-0.02	-0.04	N/A
DHX40	ENST00000251241.4	DEAH (Asp-Glu-Ala-His) box polypeptide 40	538	1	0	1	0	1	0	1	0	2	hsa-miR-186-5p	-0.02	-0.04	N/A	2011
PAN3	ENST00000282391.5	PAN3 poly(A) specific ribonuclease subunit homolog (S. cerevisiae)	361	1	0	1	0	0	0	0	0	4	hsa-miR-186-5p	-0.02	-0.02	N/A	2007, 2009, 2011
CYLD	ENST00000540145.1	cylindromatosis (turban tumor syndrome)	696	2	1	0	1	1	0	0	1	1	hsa-miR-186-5p	-0.02	-0.05	N/A	2011
CNTN4	ENST00000427331.1	contactin 4	191	1	0	0	1	1	0	0	1	4	hsa-miR-186-5p	-0.02	-0.02	N/A	2009
NR4A2	ENST00000409108.2	nuclear receptor subfamily 4, group A, member 2	1631	1	0	1	0	0	0	0	0	1	hsa-miR-186-5p	-0.02	-0.02	N/A	2007, 2011
UPF1	ENST00000262803.5	UPF1 regulator of nonsense transcripts homolog (yeast)	513	1	0	1	0	0	0	0	0	4	hsa-miR-186-5p	-0.02	-0.02	N/A	2007, 2009, 2011
PIK3CA	ENST00000263967.3	phosphatidylinositol-4,5-bisphosphate 3-kinase, catalytic subunit alpha	112	1	1	0	0	3	1	1	1	3	hsa-miR-186-5p	-0.02	-0.14	N/A
NARS	ENST00000256854.5	asparaginyl-tRNA synthetase	467	1	0	1	0	1	0	0	1	1	hsa-miR-186-5p	-0.02	-0.03	N/A
NMT1	ENST00000592782.1	N-myristoyltransferase 1	1991	1	0	1	0	0	0	0	0	1	hsa-miR-186-5p	-0.02	-0.02	N/A
HOOK1	ENST00000371208.3	hook microtubule-tethering protein 1	804	1	0	1	0	0	0	0	0	4	hsa-miR-186-5p	-0.02	-0.02	N/A	2007
PDGFA	ENST00000354513.5	platelet-derived growth factor alpha polypeptide	25	1	1	0	0	0	0	0	0	2	hsa-miR-186-5p	-0.02	-0.11	N/A	2009, 2011
CHERP	ENST00000546361.2	calcium homeostasis endoplasmic reticulum protein	614	1	0	1	0	0	0	0	0	0	hsa-miR-186-5p	-0.02	-0.02	N/A	2009, 2011
FECH	ENST00000262093.5	ferrochelatase	716	1	0	1	0	1	0	1	0	3	hsa-miR-186-5p	-0.02	-0.04	N/A
CPEB2	ENST00000538197.1	cytoplasmic polyadenylation element binding protein 2	367	1	0	1	0	0	0	0	0	1	hsa-miR-186-5p	-0.02	-0.02	N/A	2007, 2009, 2011
TNIK	ENST00000436636.2	TRAF2 and NCK interacting kinase	106	1	0	0	1	3	0	1	2	4	hsa-miR-186-5p	-0.02	-0.05	N/A
C20orf112	ENST00000359676.5	chromosome 20 open reading frame 112	148	1	0	1	0	0	0	0	0	0	hsa-miR-186-5p	-0.02	-0.02	N/A	2011
KPNA1	ENST00000344337.6	karyopherin alpha 1 (importin alpha 5)	1030	2	0	2	0	0	0	0	0	7	hsa-miR-186-5p	-0.02	-0.04	N/A	2007, 2009, 2011
VPS26B	ENST00000281187.5	vacuolar protein sorting 26 homolog B (S. pombe)	1236	1	0	1	0	0	0	0	0	0	hsa-miR-186-5p	-0.02	-0.02	N/A	2009, 2011
GFPT1	ENST00000357308.4	glutamine--fructose-6-phosphate transaminase 1	1313	1	0	0	1	1	0	0	1	6	hsa-miR-186-5p	-0.02	-0.02	N/A	2011
ARIH2	ENST00000356401.4	ariadne RBR E3 ubiquitin protein ligase 2	938	1	0	1	0	0	0	0	0	1	hsa-miR-186-5p	-0.02	-0.02	N/A
ZCCHC14	ENST00000268616.4	zinc finger, CCHC domain containing 14	64	1	0	1	0	0	0	0	0	2	hsa-miR-186-5p	-0.02	-0.02	N/A	2007, 2009, 2011
PGGT1B	ENST00000419445.1	protein geranylgeranyltransferase type I, beta subunit	25	1	0	1	0	0	0	0	0	0	hsa-miR-186-5p	-0.02	-0.02	N/A	2009, 2011
ZNF70	ENST00000341976.3	zinc finger protein 70	99	1	0	1	0	1	0	0	1	12	hsa-miR-186-5p	-0.02	-0.03	N/A
PPP1R12A	ENST00000261207.5	protein phosphatase 1, regulatory subunit 12A	276	1	0	1	0	1	0	1	0	0	hsa-miR-186-5p	-0.02	-0.04	N/A
CHSY1	ENST00000254190.3	chondroitin sulfate synthase 1	200	1	0	1	0	0	0	0	0	5	hsa-miR-186-5p	-0.02	-0.02	N/A
PPP1R15B	ENST00000367188.4	protein phosphatase 1, regulatory subunit 15B	2154	1	0	1	0	0	0	0	0	5	hsa-miR-186-5p	-0.02	-0.02	N/A
SAMD4A	ENST00000392067.3	sterile alpha motif domain containing 4A	449	1	0	1	0	0	0	0	0	4	hsa-miR-186-5p	-0.02	-0.02	N/A	2011
PYGO1	ENST00000302000.6	pygopus homolog 1 (Drosophila)	104	2	0	2	0	3	0	2	1	6	hsa-miR-186-5p	-0.02	-0.09	N/A
EIF5	ENST00000216554.3	eukaryotic translation initiation factor 5	970	1	0	1	0	0	0	0	0	5	hsa-miR-186-5p	-0.02	-0.03	N/A	2009, 2011
TNKS2	ENST00000371627.4	tankyrase, TRF1-interacting ankyrin-related ADP-ribose polymerase 2	205	1	0	0	1	1	0	0	1	3	hsa-miR-186-5p	-0.02	-0.02	N/A	2007, 2009, 2011
ZNF281	ENST00000294740.3	zinc finger protein 281	595	1	0	0	1	1	1	0	0	2	hsa-miR-186-5p	-0.02	-0.19	N/A
PHLDA3	ENST00000367311.3	pleckstrin homology-like domain, family A, member 3	82	1	0	1	0	0	0	0	0	2	hsa-miR-186-5p	-0.02	-0.02	N/A
POLH	ENST00000372226.1	polymerase (DNA directed), eta	450	1	0	0	1	2	0	0	2	1	hsa-miR-186-5p	-0.02	-0.05	N/A
BACH1	ENST00000286800.3	BTB and CNC homology 1, basic leucine zipper transcription factor 1	273	1	0	1	0	0	0	0	0	1	hsa-miR-186-5p	-0.02	-0.02	N/A	2009, 2011
PDP2	ENST00000311765.2	pyruvate dehyrogenase phosphatase catalytic subunit 2	102	1	0	0	1	1	1	0	0	6	hsa-miR-186-5p	-0.02	-0.04	N/A	2011
CELF1	ENST00000395290.2	CUGBP, Elav-like family member 1	153	1	0	1	0	0	0	0	0	11	hsa-miR-186-5p	-0.02	-0.02	N/A	2007, 2009, 2011
ARHGAP26	ENST00000378004.3	Rho GTPase activating protein 26	131	1	1	0	0	0	0	0	0	2	hsa-miR-186-5p	-0.02	-0.03	N/A	2009, 2011
CXXC5	ENST00000302517.3	CXXC finger protein 5	1285	1	0	1	0	0	0	0	0	1	hsa-miR-186-5p	-0.02	-0.02	N/A	2007
STAG2	ENST00000371160.1	stromal antigen 2	216	1	0	1	0	0	0	0	0	1	hsa-miR-186-5p	-0.02	-0.02	N/A	2007, 2011
SH3PXD2A	ENST00000369774.4	SH3 and PX domains 2A	152	1	0	0	1	1	0	0	1	5	hsa-miR-186-5p	-0.02	-0.02	N/A
CHSY3	ENST00000305031.4	chondroitin sulfate synthase 3	221	1	0	1	0	2	0	1	1	1	hsa-miR-186-5p	-0.02	-0.11	N/A
MME	ENST00000460393.1	membrane metallo-endopeptidase	37	1	0	1	0	1	0	1	0	1	hsa-miR-186-5p	-0.02	-0.04	N/A	2011
THRB	ENST00000396671.2	thyroid hormone receptor, beta	55	1	0	0	1	3	0	1	2	6	hsa-miR-186-5p	-0.02	-0.05	N/A	2011
MEX3A	ENST00000532414.2	mex-3 RNA binding family member A	912	1	0	0	1	1	0	0	1	1	hsa-miR-186-5p	-0.02	-0.02	N/A	2009, 2011
TPRG1	ENST00000345063.3	tumor protein p63 regulated 1	24	2	1	1	0	2	0	1	1	6	hsa-miR-186-5p	-0.02	-0.08	N/A	2009, 2011
DDX3X	ENST00000399959.2	DEAD (Asp-Glu-Ala-Asp) box helicase 3, X-linked	965	1	0	1	0	0	0	0	0	2	hsa-miR-186-5p	-0.02	-0.06	N/A	2007, 2009, 2011
NAA35	ENST00000361671.5	N(alpha)-acetyltransferase 35, NatC auxiliary subunit	69	1	1	0	0	1	0	1	0	2	hsa-miR-186-5p	-0.02	-0.05	N/A
AKT3	ENST00000366539.1	v-akt murine thymoma viral oncogene homolog 3	168	1	1	0	0	2	0	0	2	3	hsa-miR-186-5p	-0.02	-0.05	N/A
MPP3	ENST00000398393.1	membrane protein, palmitoylated 3 (MAGUK p55 subfamily member 3)	110	1	0	1	0	0	0	0	0	0	hsa-miR-186-5p	-0.02	-0.02	N/A	2009, 2011
RAB4A	ENST00000366690.4	RAB4A, member RAS oncogene family	850	1	0	0	1	4	0	1	3	3	hsa-miR-186-5p	-0.02	-0.1	N/A
ELP2	ENST00000358232.6	elongator acetyltransferase complex subunit 2	845	1	1	0	0	2	0	1	1	4	hsa-miR-186-5p	-0.02	-0.06	N/A
BAZ2B	ENST00000392782.1	bromodomain adjacent to zinc finger domain, 2B	25	1	0	1	0	3	1	1	1	7	hsa-miR-186-5p	-0.02	-0.08	N/A	2011
FNDC3A	ENST00000492622.2	fibronectin type III domain containing 3A	122	1	0	1	0	1	0	0	1	5	hsa-miR-186-5p	-0.01	-0.03	N/A	2007, 2009, 2011
SSBP3	ENST00000417664.2	single stranded DNA binding protein 3	1474	1	0	1	0	0	0	0	0	2	hsa-miR-186-5p	-0.01	-0.02	N/A
PSD3	ENST00000327040.8	pleckstrin and Sec7 domain containing 3	133	1	0	0	1	4	0	2	2	8	hsa-miR-186-5p	-0.01	-0.07	N/A	2007, 2009, 2011
GNAZ	ENST00000248996.4	guanine nucleotide binding protein (G protein), alpha z polypeptide	50	1	0	1	0	0	0	0	0	1	hsa-miR-186-5p	-0.01	-0.02	N/A	2007, 2009, 2011
TMEM218	ENST00000532156.1	transmembrane protein 218	553	1	0	1	0	1	0	0	1	2	hsa-miR-186-5p	-0.01	-0.07	N/A
PSMD12	ENST00000356126.3	proteasome (prosome, macropain) 26S subunit, non-ATPase, 12	399	1	0	1	0	2	0	0	2	1	hsa-miR-186-5p	-0.01	-0.04	N/A
SYT7	ENST00000263846.4	synaptotagmin VII	192	1	0	0	1	1	1	0	0	2	hsa-miR-186-5p	-0.01	-0.04	N/A	2007
SLC35D1	ENST00000235345.5	solute carrier family 35 (UDP-GlcA/UDP-GalNAc transporter), member D1	186	1	1	0	0	2	0	1	1	6	hsa-miR-186-5p	-0.01	-0.06	N/A
GDF6	ENST00000287020.5	growth differentiation factor 6	14	1	0	1	0	1	0	0	1	3	hsa-miR-186-5p	-0.01	-0.03	N/A
MMAA	ENST00000281317.5	methylmalonic aciduria (cobalamin deficiency) cblA type	38	1	0	1	0	2	0	0	2	6	hsa-miR-186-5p	-0.01	-0.04	N/A	2011
NRG2	ENST00000394770.1	neuregulin 2	9	1	1	0	0	0	0	0	0	2	hsa-miR-186-5p	-0.01	-0.03	N/A	2011
SLC23A2	ENST00000338244.1	solute carrier family 23 (ascorbic acid transporter), member 2	121	1	0	1	0	1	1	0	0	1	hsa-miR-186-5p	-0.01	-0.05	N/A	2007, 2009, 2011
TMEM242	ENST00000400788.4	transmembrane protein 242	593	1	1	0	0	0	0	0	0	1	hsa-miR-186-5p	-0.01	-0.07	N/A	2009, 2011
CLDN1	ENST00000295522.3	claudin 1	153	1	0	1	0	2	0	2	0	2	hsa-miR-186-5p	-0.01	-0.06	N/A	2007, 2011
SLC22A15	ENST00000369503.4	solute carrier family 22, member 15	25	1	1	0	0	0	0	0	0	1	hsa-miR-186-5p	-0.01	-0.03	N/A	2009, 2011
UBAC1	ENST00000371756.3	UBA domain containing 1	52	1	0	0	1	0	0	0	0	0	hsa-miR-186-5p	-0.01	-0.01	N/A	2007, 2011
ATP6V0E1	ENST00000519374.1	ATPase, H+ transporting, lysosomal 9kDa, V0 subunit e1	1195	1	1	0	0	0	0	0	0	3	hsa-miR-186-5p	-0.01	-0.1	N/A
ZBTB10	ENST00000430430.1	zinc finger and BTB domain containing 10	113	1	0	1	0	0	0	0	0	8	hsa-miR-186-5p	-0.01	-0.02	N/A
HEMK1	ENST00000232854.4	HemK methyltransferase family member 1	99	1	0	1	0	0	0	0	0	0	hsa-miR-186-5p	-0.01	-0.02	N/A
TRAF7	ENST00000326181.6	TNF receptor-associated factor 7, E3 ubiquitin protein ligase	1505	1	0	0	1	0	0	0	0	0	hsa-miR-186-5p	-0.01	-0.05	N/A	2009, 2011
DDX52	ENST00000349699.2	DEAD (Asp-Glu-Ala-Asp) box polypeptide 52	865	1	0	1	0	1	0	0	1	2	hsa-miR-186-5p	-0.01	-0.03	N/A
HNRNPU	ENST00000444376.2	heterogeneous nuclear ribonucleoprotein U (scaffold attachment factor A)	5343	2	1	0	1	0	0	0	0	5	hsa-miR-186-5p	-0.01	-0.04	N/A	2007, 2009, 2011
SPRYD3	ENST00000301463.4	SPRY domain containing 3	353	1	1	0	0	1	0	0	1	1	hsa-miR-186-5p	-0.01	-0.18	N/A	2011
VPS53	ENST00000437048.2	vacuolar protein sorting 53 homolog (S. cerevisiae)	1332	1	0	1	0	2	0	0	2	3	hsa-miR-186-5p	-0.01	-0.04	N/A	2011
AP5M1	ENST00000261558.3	adaptor-related protein complex 5, mu 1 subunit	198	2	0	2	0	1	0	0	1	5	hsa-miR-186-5p	-0.01	-0.05	N/A
SLITRK4	ENST00000381779.4	SLIT and NTRK-like family, member 4	86	1	1	0	0	4	0	2	2	3	hsa-miR-186-5p	-0.01	-0.09	N/A	2011
SMLR1	ENST00000541421.2	small leucine-rich protein 1	35	1	0	1	0	1	0	0	1	2	hsa-miR-186-5p	-0.01	-0.08	N/A	2011
HNRNPR	ENST00000478691.1	heterogeneous nuclear ribonucleoprotein R	6629	1	1	0	0	5	1	2	2	5	hsa-miR-186-5p	-0.01	-0.22	N/A
FAM175B	ENST00000298492.5	family with sequence similarity 175, member B	525	2	0	1	1	0	0	0	0	3	hsa-miR-186-5p	-0.01	-0.03	N/A
TMEM30B	ENST00000555868.1	transmembrane protein 30B	10	1	0	1	0	0	0	0	0	3	hsa-miR-186-5p	-0.01	-0.02	N/A	2009, 2011
RPRD2	ENST00000539519.1	regulation of nuclear pre-mRNA domain containing 2	280	1	0	1	0	1	0	0	1	3	hsa-miR-186-5p	-0.01	-0.03	N/A	2011
FASTKD2	ENST00000236980.6	FAST kinase domains 2	579	1	0	1	0	2	0	1	1	2	hsa-miR-186-5p	-0.01	-0.05	N/A	2011
CTNS	ENST00000046640.3	cystinosin, lysosomal cystine transporter	308	1	0	0	1	1	0	0	1	0	hsa-miR-186-5p	-0.01	-0.02	N/A	2011
PKNOX1	ENST00000291547.5	PBX/knotted 1 homeobox 1	297	1	1	0	0	0	0	0	0	4	hsa-miR-186-5p	-0.01	-0.1	N/A	2011
ZBTB20	ENST00000462705.1	zinc finger and BTB domain containing 20	5	3	1	1	1	9	1	2	6	30	hsa-miR-186-5p	-0.01	-0.2	N/A	2007, 2009, 2011
TMEM167A	ENST00000502346.1	transmembrane protein 167A	1029	1	0	1	0	2	0	1	1	2	hsa-miR-186-5p	-0.01	-0.15	N/A
FBXO47	ENST00000378079.2	F-box protein 47	5	1	0	1	0	6	0	3	3	1	hsa-miR-186-5p	-0.01	-0.11	N/A
PBX1	ENST00000367897.1	pre-B-cell leukemia homeobox 1	18	2	0	2	0	2	1	0	1	9	hsa-miR-186-5p	-0.01	-0.11	N/A	2007, 2011
CDR2L	ENST00000337231.5	cerebellar degeneration-related protein 2-like	28	1	0	0	1	0	0	0	0	0	hsa-miR-186-5p	-0.01	-0.01	N/A	2007, 2011
SMAD6	ENST00000288840.5	SMAD family member 6	660	1	0	1	0	0	0	0	0	2	hsa-miR-186-5p	-0.01	-0.15	N/A
MAPK1IP1L	ENST00000395468.4	mitogen-activated protein kinase 1 interacting protein 1-like	4002	1	1	0	0	1	0	0	1	7	hsa-miR-186-5p	-0.01	-0.06	N/A	2009, 2011
RP11-770J1.4	ENST00000532619.1		5	1	0	0	1	0	0	0	0	1	hsa-miR-186-5p	-0.01	-0.01	N/A
RILPL1	ENST00000376874.4	Rab interacting lysosomal protein-like 1	155	1	0	0	1	0	0	0	0	6	hsa-miR-186-5p	-0.01	-0.01	N/A
HIF1A	ENST00000323441.6	hypoxia inducible factor 1, alpha subunit (basic helix-loop-helix transcription factor)	1955	1	0	0	1	0	0	0	0	5	hsa-miR-186-5p	-0.01	-0.01	N/A
KIAA1522	ENST00000401073.2	KIAA1522	13	1	0	0	1	0	0	0	0	2	hsa-miR-186-5p	-0.01	-0.01	N/A	2009, 2011
MIP	ENST00000257979.4	major intrinsic protein of lens fiber	5	1	0	0	1	0	0	0	0	2	hsa-miR-186-5p	-0.01	-0.01	N/A	2007, 2011
C2orf91	ENST00000378711.2	chromosome 2 open reading frame 91	5	1	0	0	1	0	0	0	0	1	hsa-miR-186-5p	-0.01	-0.01	N/A	2011
CELF3	ENST00000290585.4	CUGBP, Elav-like family member 3	5	1	0	0	1	0	0	0	0	5	hsa-miR-186-5p	-0.01	-0.01	N/A	2007, 2009, 2011
HNRNPC	ENST00000336053.6	heterogeneous nuclear ribonucleoprotein C (C1/C2)	1103	1	0	0	1	0	0	0	0	3	hsa-miR-186-5p	-0.01	-0.01	N/A	2009, 2011
LRRC10B	ENST00000378075.2	leucine rich repeat containing 10B	5	1	0	0	1	0	0	0	0	0	hsa-miR-186-5p	-0.01	-0.01	N/A	2011
MDGA1	ENST00000297153.7	MAM domain containing glycosylphosphatidylinositol anchor 1	240	1	0	0	1	0	0	0	0	0	hsa-miR-186-5p	-0.01	-0.01	N/A	2009, 2011
PTCD1	ENST00000292478.4	pentatricopeptide repeat domain 1	22	1	0	0	1	0	0	0	0	1	hsa-miR-186-5p	-0.01	-0.03	N/A
ATP5J2-PTCD1	ENST00000413834.1	ATP5J2-PTCD1 readthrough	22	1	0	0	1	0	0	0	0	1	hsa-miR-186-5p	-0.01	-0.06	N/A
TMED4	ENST00000457408.2	transmembrane emp24 protein transport domain containing 4	3117	1	0	0	1	0	0	0	0	2	hsa-miR-186-5p	-0.01	-0.01	N/A
CKAP4	ENST00000378026.4	cytoskeleton-associated protein 4	1923	1	0	0	1	0	0	0	0	5	hsa-miR-186-5p	-0.01	-0.01	N/A
DMD	ENST00000378677.2	dystrophin	211	1	0	0	1	5	0	2	3	5	hsa-miR-186-5p	-0.01	-0.08	N/A	2011
C14orf37	ENST00000267485.7	chromosome 14 open reading frame 37	25	1	0	0	1	1	0	1	0	2	hsa-miR-186-5p	-0.01	-0.03	N/A
WAC	ENST00000375664.4	WW domain containing adaptor with coiled-coil	322	1	1	0	0	1	0	0	1	4	hsa-miR-186-5p	-0.01	-0.04	N/A	2011
RBM26	ENST00000267229.7	RNA binding motif protein 26	122	1	0	1	0	1	0	1	0	5	hsa-miR-186-5p	-0.01	-0.05	N/A	2007, 2009, 2011
RSRC2	ENST00000331738.7	arginine/serine-rich coiled-coil 2	320	1	0	0	1	0	0	0	0	3	hsa-miR-186-5p	-0.01	-0.01	N/A	2007
HNRNPUL2	ENST00000301785.5	heterogeneous nuclear ribonucleoprotein U-like 2	2321	1	0	0	1	1	0	1	0	0	hsa-miR-186-5p	-0.01	-0.03	N/A	2011
BAHD1	ENST00000416165.1	bromo adjacent homology domain containing 1	76	1	0	0	1	0	0	0	0	0	hsa-miR-186-5p	-0.01	-0.01	N/A	2007, 2009, 2011
DHX9	ENST00000367549.3	DEAH (Asp-Glu-Ala-His) box helicase 9	320	1	0	0	1	0	0	0	0	1	hsa-miR-186-5p	-0.01	-0.01	N/A
SLC22A23	ENST00000436008.2	solute carrier family 22, member 23	353	1	0	0	1	1	0	0	1	2	hsa-miR-186-5p	-0.01	-0.02	N/A	2011
DCLRE1C	ENST00000378289.4	DNA cross-link repair 1C	29	1	0	1	0	0	0	0	0	0	hsa-miR-186-5p	-0.01	-0.05	N/A
TXNIP	ENST00000369317.4	thioredoxin interacting protein	11	1	0	1	0	0	0	0	0	1	hsa-miR-186-5p	-0.01	-0.02	N/A	2011
SPPL2A	ENST00000261854.5	signal peptide peptidase like 2A	240	1	0	1	0	0	0	0	0	7	hsa-miR-186-5p	-0.01	-0.02	N/A
UGGT1	ENST00000259253.6	UDP-glucose glycoprotein glucosyltransferase 1	1377	1	0	0	1	4	0	1	3	1	hsa-miR-186-5p	-0.01	-0.06	N/A	2011
PIGV	ENST00000078527.4	phosphatidylinositol glycan anchor biosynthesis, class V	122	1	0	0	1	1	0	1	0	1	hsa-miR-186-5p	-0.01	-0.04	N/A
SRPK1	ENST00000373825.2	SRSF protein kinase 1	114	1	0	1	0	2	0	1	1	1	hsa-miR-186-5p	-0.01	-0.05	N/A	2007, 2009, 2011
ADCY5	ENST00000462833.1	adenylate cyclase 5	25	1	0	0	1	0	0	0	0	0	hsa-miR-186-5p	-0.01	-0.01	N/A	2011
SMAD2	ENST00000262160.6	SMAD family member 2	1196	1	0	1	0	2	0	1	1	8	hsa-miR-186-5p	-0.01	-0.05	N/A
CAB39L	ENST00000355854.4	calcium binding protein 39-like	12	1	0	1	0	0	0	0	0	1	hsa-miR-186-5p	-0.01	-0.02	N/A	2011
VSIG10	ENST00000359236.5	V-set and immunoglobulin domain containing 10	355	1	0	1	0	1	0	0	1	1	hsa-miR-186-5p	-0.01	-0.03	N/A	2011
IRS1	ENST00000305123.5	insulin receptor substrate 1	804	1	0	0	1	1	0	1	0	5	hsa-miR-186-5p	-0.01	-0.03	N/A
YAF2	ENST00000327791.4	YY1 associated factor 2	413	1	1	0	0	1	0	0	1	1	hsa-miR-186-5p	-0.01	-0.24	N/A	2009, 2011
FBXO48	ENST00000377957.3	F-box protein 48	13	1	0	1	0	0	0	0	0	2	hsa-miR-186-5p	-0.01	-0.02	N/A
ANTXR2	ENST00000403729.2	anthrax toxin receptor 2	51	1	0	0	1	1	0	0	1	7	hsa-miR-186-5p	-0.01	-0.02	N/A	2011
GFRA1	ENST00000439649.3	GDNF family receptor alpha 1	69	1	0	1	0	3	0	1	2	6	hsa-miR-186-5p	-0.01	-0.11	N/A	2011
EIF5B	ENST00000289371.6	eukaryotic translation initiation factor 5B	188	1	0	0	1	2	0	0	2	1	hsa-miR-186-5p	-0.01	-0.05	N/A
KIF3A	ENST00000378746.4	kinesin family member 3A	33	1	0	0	1	0	0	0	0	4	hsa-miR-186-5p	-0.01	-0.01	N/A	2009, 2011
ARFGEF1	ENST00000262215.3	ADP-ribosylation factor guanine nucleotide-exchange factor 1 (brefeldin A-inhibited)	70	1	0	0	1	0	0	0	0	4	hsa-miR-186-5p	-0.01	-0.01	N/A
BTRC	ENST00000370187.3	beta-transducin repeat containing E3 ubiquitin protein ligase	96	1	0	1	0	1	0	0	1	1	hsa-miR-186-5p	-0.01	-0.03	N/A
SESN3	ENST00000536441.1	sestrin 3	260	1	0	0	1	5	1	3	1	6	hsa-miR-186-5p	-0.01	-0.11	N/A
LARP4B	ENST00000316157.3	La ribonucleoprotein domain family, member 4B	705	1	0	0	1	0	0	0	0	5	hsa-miR-186-5p	-0.01	-0.01	N/A	2007
SBNO1	ENST00000420886.2	strawberry notch homolog 1 (Drosophila)	87	1	0	1	0	2	0	0	2	12	hsa-miR-186-5p	-0.01	-0.04	N/A	2011
TFAP2B	ENST00000393655.3	transcription factor AP-2 beta (activating enhancer binding protein 2 beta)	23	2	0	0	2	1	0	0	1	4	hsa-miR-186-5p	-0.01	-0.03	N/A	2007, 2009, 2011
SPTLC2	ENST00000216484.2	serine palmitoyltransferase, long chain base subunit 2	95	1	0	1	0	0	0	0	0	4	hsa-miR-186-5p	-0.01	-0.02	N/A	2011
AGPS	ENST00000264167.4	alkylglycerone phosphate synthase	1610	1	0	1	0	5	0	4	1	4	hsa-miR-186-5p	-0.01	-0.11	N/A	2011
WIPF2	ENST00000323571.4	WAS/WASL interacting protein family, member 2	214	1	0	1	0	1	0	1	0	7	hsa-miR-186-5p	-0.01	-0.04	N/A
NAA40	ENST00000377793.4	N(alpha)-acetyltransferase 40, NatD catalytic subunit	217	1	0	0	1	0	0	0	0	3	hsa-miR-186-5p	-0.01	-0.01	N/A
RNF170	ENST00000534961.1	ring finger protein 170	203	1	0	1	0	0	0	0	0	3	hsa-miR-186-5p	-0.01	-0.04	N/A	2011
EXT2	ENST00000395673.3	exostosin glycosyltransferase 2	896	1	0	1	0	0	0	0	0	3	hsa-miR-186-5p	-0.01	-0.02	N/A
LGALS8	ENST00000526589.1	lectin, galactoside-binding, soluble, 8	188	1	0	1	0	1	0	0	1	0	hsa-miR-186-5p	-0.01	-0.03	N/A	2011
MTMR3	ENST00000333027.3	myotubularin related protein 3	123	1	0	1	0	1	0	0	1	2	hsa-miR-186-5p	-0.01	-0.03	N/A	2009, 2011
DDR2	ENST00000367922.3	discoidin domain receptor tyrosine kinase 2	41	1	0	0	1	2	0	1	1	2	hsa-miR-186-5p	-0.01	-0.04	N/A
TOP2B	ENST00000542520.1	topoisomerase (DNA) II beta 180kDa	28	1	0	1	0	0	0	0	0	1	hsa-miR-186-5p	-0.01	-0.02	N/A
SLC16A10	ENST00000368850.3	solute carrier family 16 (aromatic amino acid transporter), member 10	233	1	1	0	0	0	0	0	0	8	hsa-miR-186-5p	-0.01	-0.04	N/A
KAZN	ENST00000422387.2	kazrin, periplakin interacting protein	34	1	0	0	1	1	0	1	0	4	hsa-miR-186-5p	-0.01	-0.03	N/A	2011
AFG3L2	ENST00000269143.3	AFG3 ATPase family member 3-like 2 (S. cerevisiae)	498	1	0	0	1	0	0	0	0	0	hsa-miR-186-5p	0	-0.02	N/A
EPC1	ENST00000319778.6	enhancer of polycomb homolog 1 (Drosophila)	102	1	1	0	0	0	0	0	0	1	hsa-miR-186-5p	0	-0.03	N/A
SUZ12	ENST00000322652.5	SUZ12 polycomb repressive complex 2 subunit	104	1	1	0	0	0	0	0	0	1	hsa-miR-186-5p	0	-0.03	N/A	2009, 2011
SSH1	ENST00000360239.3	slingshot protein phosphatase 1	115	1	0	0	1	0	0	0	0	2	hsa-miR-186-5p	0	-0.01	N/A
ATP5G3	ENST00000284727.4	ATP synthase, H+ transporting, mitochondrial Fo complex, subunit C3 (subunit 9)	7944	1	0	1	0	0	0	0	0	1	hsa-miR-186-5p	0	-0.1	N/A
MASTL	ENST00000342386.6	microtubule associated serine/threonine kinase-like	317	1	0	1	0	0	0	0	0	3	hsa-miR-186-5p	0	-0.04	N/A
PANX1	ENST00000227638.3	pannexin 1	576	1	0	1	0	1	0	0	1	2	hsa-miR-186-5p	0	-0.05	N/A
MXI1	ENST00000332674.5	MAX interactor 1, dimerization protein	278	1	0	1	0	1	0	0	1	2	hsa-miR-186-5p	0	-0.03	N/A
SMIM12	ENST00000521580.2	small integral membrane protein 12	1091	1	0	1	0	1	0	1	0	5	hsa-miR-186-5p	0	-0.15	N/A
TMEM184C	ENST00000296582.3	transmembrane protein 184C	94	1	1	0	0	0	0	0	0	0	hsa-miR-186-5p	0	-0.03	N/A	2009, 2011
LOX	ENST00000231004.4	lysyl oxidase	3441	1	0	1	0	0	0	0	0	3	hsa-miR-186-5p	0	-0.05	N/A	2011
TIGD7	ENST00000396862.1	tigger transposable element derived 7	22	1	0	0	1	0	0	0	0	0	hsa-miR-186-5p	0	-0.02	N/A	2011
MON2	ENST00000546600.1	MON2 homolog (S. cerevisiae)	784	2	1	0	1	2	1	0	1	0	hsa-miR-186-5p	0	-0.08	N/A	2009, 2011
RAB11A	ENST00000569896.1	RAB11A, member RAS oncogene family	5781	1	0	1	0	0	0	0	0	1	hsa-miR-186-5p	0	-0.06	N/A	2011
ICMT	ENST00000343813.5	isoprenylcysteine carboxyl methyltransferase	558	1	0	1	0	0	0	0	0	5	hsa-miR-186-5p	0	-0.02	N/A	2007, 2009, 2011
GNAI1	ENST00000351004.3	guanine nucleotide binding protein (G protein), alpha inhibiting activity polypeptide 1	1346	1	1	0	0	1	0	0	1	3	hsa-miR-186-5p	0	-0.04	N/A	2009, 2011
HNRNPA0	ENST00000314940.4	heterogeneous nuclear ribonucleoprotein A0	22668	1	1	0	0	5	1	4	0	2	hsa-miR-186-5p	0	-0.23	N/A	2009, 2011
DDX42	ENST00000578681.1	DEAD (Asp-Glu-Ala-Asp) box helicase 42	797	1	0	0	1	0	0	0	0	2	hsa-miR-186-5p	0	-0.01	N/A	2007, 2009, 2011
IFT74	ENST00000380062.5	intraflagellar transport 74 homolog (Chlamydomonas)	246	1	0	0	1	2	1	1	0	3	hsa-miR-186-5p	0	-0.13	N/A
ABI2	ENST00000295851.5	abl-interactor 2	877	1	1	0	0	7	0	2	5	12	hsa-miR-186-5p	0	-0.12	N/A	2007
FAM168A	ENST00000064778.4	family with sequence similarity 168, member A	68	1	0	1	0	0	0	0	0	4	hsa-miR-186-5p	0	-0.02	N/A
OTUD6A	ENST00000338352.2	OTU domain containing 6A	5	1	0	1	0	1	1	0	0	2	hsa-miR-186-5p	0	-0.2	N/A
TTC37	ENST00000358746.2	tetratricopeptide repeat domain 37	296	1	0	0	1	1	0	1	0	3	hsa-miR-186-5p	0	-0.03	N/A
TFAP2A	ENST00000379613.3	transcription factor AP-2 alpha (activating enhancer binding protein 2 alpha)	367	1	0	1	0	0	0	0	0	0	hsa-miR-186-5p	0	-0.02	N/A	2007, 2009, 2011
ARMC8	ENST00000469044.1	armadillo repeat containing 8	398	1	0	0	1	1	0	0	1	2	hsa-miR-186-5p	0	-0.02	N/A	2011
IGSF10	ENST00000282466.3	immunoglobulin superfamily, member 10	191	1	0	0	1	3	1	0	2	2	hsa-miR-186-5p	0	-0.06	N/A
TFDP2	ENST00000499676.2	transcription factor Dp-2 (E2F dimerization partner 2)	128	1	1	0	0	0	0	0	0	2	hsa-miR-186-5p	0	-0.03	N/A
ATXN7L3B	ENST00000519948.2	ataxin 7-like 3B	55	1	0	0	1	0	0	0	0	4	hsa-miR-186-5p	0	-0.01	N/A	2011
AIDA	ENST00000340020.6	axin interactor, dorsalization associated	48	1	1	0	0	1	0	1	0	2	hsa-miR-186-5p	0	-0.06	N/A
ING2	ENST00000302327.3	inhibitor of growth family, member 2	193	1	0	1	0	1	0	0	1	1	hsa-miR-186-5p	0	-0.03	N/A
GLRX2	ENST00000367439.3	glutaredoxin 2	310	1	1	0	0	2	0	1	1	0	hsa-miR-186-5p	0	-0.06	N/A
LAMTOR5	ENST00000483260.1	late endosomal/lysosomal adaptor, MAPK and MTOR activator 5	3679	1	1	0	0	0	0	0	0	0	hsa-miR-186-5p	0	-0.4	N/A
SUV420H1	ENST00000304363.4	suppressor of variegation 4-20 homolog 1 (Drosophila)	62	1	0	0	1	0	0	0	0	2	hsa-miR-186-5p	0	-0.01	N/A
DTD2	ENST00000310850.4	D-tyrosyl-tRNA deacylase 2 (putative)	924	1	0	0	1	0	0	0	0	1	hsa-miR-186-5p	0	-0.01	N/A	2011
SMURF2	ENST00000262435.9	SMAD specific E3 ubiquitin protein ligase 2	978	1	0	1	0	0	0	0	0	2	hsa-miR-186-5p	0	-0.02	N/A
MTDH	ENST00000336273.3	metadherin	5192	1	0	0	1	1	0	0	1	2	hsa-miR-186-5p	0	-0.02	N/A	2011
XRCC5	ENST00000392133.3	X-ray repair complementing defective repair in Chinese hamster cells 5 (double-strand-break rejoining)	14802	2	0	2	0	2	1	0	1	7	hsa-miR-186-5p	0	-0.08	N/A
CADM1	ENST00000452722.3	cell adhesion molecule 1	676	1	0	0	1	1	0	1	0	3	hsa-miR-186-5p	0	-0.05	N/A
TOMM6	ENST00000398884.3	translocase of outer mitochondrial membrane 6 homolog (yeast)	2735	1	0	1	0	2	0	1	1	0	hsa-miR-186-5p	0	-0.21	N/A
AHSA2	ENST00000394457.3	AHA1, activator of heat shock 90kDa protein ATPase homolog 2 (yeast)	820	3	3	0	0	1	0	1	0	4	hsa-miR-186-5p	0	-0.14	N/A
FAM216A	ENST00000377673.5	family with sequence similarity 216, member A	1234	2	0	1	1	1	1	0	0	1	hsa-miR-186-5p	0	-0.12	N/A
MURC	ENST00000307584.5	muscle-related coiled-coil protein	75	1	0	1	0	0	0	0	0	1	hsa-miR-186-5p	0	-0.03	N/A
KIAA1328	ENST00000592521.1	KIAA1328	155	1	0	1	0	0	0	0	0	0	hsa-miR-186-5p	0	-0.04	N/A
RAPGEF4	ENST00000409036.1	Rap guanine nucleotide exchange factor (GEF) 4	60	1	1	0	0	1	0	1	0	4	hsa-miR-186-5p	0	-0.05	N/A
MMAB	ENST00000545712.2	methylmalonic aciduria (cobalamin deficiency) cblB type	2107	1	0	1	0	0	0	0	0	0	hsa-miR-186-5p	0	-0.04	N/A	2009, 2011
DAZAP2	ENST00000412716.3	DAZ associated protein 2	4265	1	1	0	0	0	0	0	0	1	hsa-miR-186-5p	0	-0.08	N/A	2011
MBD2	ENST00000256429.3	methyl-CpG binding domain protein 2	823	1	0	1	0	2	0	2	0	5	hsa-miR-186-5p	0	-0.06	N/A	2011
INVS	ENST00000262457.2	inversin	130	1	0	0	1	0	0	0	0	0	hsa-miR-186-5p	0	-0.01	N/A
KCMF1	ENST00000409785.4	potassium channel modulatory factor 1	1285	2	0	0	2	0	0	0	0	3	hsa-miR-186-5p	0	-0.02	N/A	2009, 2011
BBIP1	ENST00000454061.1	BBSome interacting protein 1	772	1	1	0	0	0	0	0	0	0	hsa-miR-186-5p	0	-0.23	N/A	2011
GLP2R	ENST00000262441.5	glucagon-like peptide 2 receptor	247	1	0	1	0	3	1	1	1	1	hsa-miR-186-5p	0	-0.08	N/A
SEC31B	ENST00000370345.3	SEC31 homolog B (S. cerevisiae)	43	1	0	1	0	0	0	0	0	2	hsa-miR-186-5p	0	-0.02	N/A
GID4	ENST00000268719.4	GID complex subunit 4	79	1	0	0	1	0	0	0	0	1	hsa-miR-186-5p	0	-0.01	N/A	2007
ATG7	ENST00000354449.3	autophagy related 7	1467	1	1	0	0	1	0	1	0	1	hsa-miR-186-5p	0	-0.05	N/A	2011
NDUFB9	ENST00000276689.3	NADH dehydrogenase (ubiquinone) 1 beta subcomplex, 9, 22kDa	225	2	0	1	1	0	0	0	0	1	hsa-miR-186-5p	0	-0.03	N/A
TRIP4	ENST00000261884.3	thyroid hormone receptor interactor 4	143	1	0	0	1	1	0	1	0	1	hsa-miR-186-5p	0	-0.03	N/A
TMEM30C	ENST00000429523.2	transmembrane protein 30C	5	1	1	0	0	0	0	0	0	0	hsa-miR-186-5p	0	-0.32	N/A
PDCD6IP	ENST00000307296.3	programmed cell death 6 interacting protein	6149	1	0	1	0	0	0	0	0	3	hsa-miR-186-5p	0	-0.03	N/A	2009, 2011
TMBIM6	ENST00000423828.1	transmembrane BAX inhibitor motif containing 6	4043	1	0	0	1	0	0	0	0	1	hsa-miR-186-5p	0	-0.01	N/A	2007, 2009, 2011
CCNDBP1	ENST00000300213.4	cyclin D-type binding-protein 1	1136	1	0	1	0	0	0	0	0	3	hsa-miR-186-5p	0	-0.05	N/A
EIF2B2	ENST00000266126.5	eukaryotic translation initiation factor 2B, subunit 2 beta, 39kDa	1210	1	0	1	0	1	0	1	0	0	hsa-miR-186-5p	0	-0.04	N/A
SMNDC1	ENST00000369603.5	survival motor neuron domain containing 1	949	1	0	1	0	0	0	0	0	0	hsa-miR-186-5p	0	-0.02	N/A
NLE1	ENST00000586869.1	notchless homolog 1 (Drosophila)	526	1	0	0	1	1	0	1	0	2	hsa-miR-186-5p	0	-0.03	N/A
OCIAD2	ENST00000273860.4	OCIA domain containing 2	344	1	0	1	0	0	0	0	0	2	hsa-miR-186-5p	0	-0.02	N/A
METTL24	ENST00000338882.4	methyltransferase like 24	5	2	2	0	0	2	1	0	1	2	hsa-miR-186-5p	0	-0.12	N/A
RGPD4	ENST00000408999.3	RANBP2-like and GRIP domain containing 4	5	1	0	1	0	3	0	1	2	2	hsa-miR-186-5p	0	-0.09	N/A
LETMD1	ENST00000380123.2	LETM1 domain containing 1	1619	1	0	0	1	2	0	2	0	3	hsa-miR-186-5p	0	-0.05	N/A
CMC1	ENST00000466830.1	COX assembly mitochondrial protein 1 homolog (S. cerevisiae)	1203	1	0	0	1	1	0	0	1	1	hsa-miR-186-5p	0	-0.05	N/A
ASAP3	ENST00000495646.1	ArfGAP with SH3 domain, ankyrin repeat and PH domain 3	196	1	0	1	0	0	0	0	0	1	hsa-miR-186-5p	0	-0.02	N/A
GPR65	ENST00000267549.3	G protein-coupled receptor 65	5	1	0	1	0	1	0	0	1	6	hsa-miR-186-5p	0	-0.08	N/A
SLC10A6	ENST00000273905.6	solute carrier family 10 (sodium/bile acid cotransporter), member 6	7	1	1	0	0	1	0	1	0	2	hsa-miR-186-5p	0	-0.05	N/A
NUP37	ENST00000552283.1	nucleoporin 37kDa	458	1	0	0	1	0	0	0	0	2	hsa-miR-186-5p	0	-0.01	N/A
RBM38	ENST00000440234.2	RNA binding motif protein 38	18	1	0	0	1	0	0	0	0	0	hsa-miR-186-5p	0	-0.14	N/A	2007, 2011
BSND	ENST00000371265.4	Bartter syndrome, infantile, with sensorineural deafness (Barttin)	5	1	0	1	0	1	0	0	1	3	hsa-miR-186-5p	0	-0.03	N/A
GTF3C2	ENST00000359541.2	general transcription factor IIIC, polypeptide 2, beta 110kDa	981	1	0	1	0	0	0	0	0	1	hsa-miR-186-5p	0	-0.02	N/A
CACNG2	ENST00000300105.6	calcium channel, voltage-dependent, gamma subunit 2	5	1	0	1	0	0	0	0	0	3	hsa-miR-186-5p	0	-0.02	N/A	2011
FAM229B	ENST00000368656.2	family with sequence similarity 229, member B	237	2	2	0	0	2	0	1	1	1	hsa-miR-186-5p	0	-0.09	N/A
TTPA	ENST00000260116.4	tocopherol (alpha) transfer protein	5	2	0	0	2	0	0	0	0	0	hsa-miR-186-5p	0	-0.02	N/A	2011
